# Supplementary material for: Genetic Evidence of an East Asian Origin and Paleolithic Northward Migration of Y-chromosome Haplogroup N
Source: PLoS One. 2013 Jun 20;8(6):e66102. doi: 10.1371/journal.pone.0066102 (PMC3688714; doi:10.1371/journal.pone.0066102)
Supplement: Table S2 — The STR genotyping data of Hg N samples. (DOCX) [file pone.0066102.s002.docx]

Table S2. The STR genotyping data of Hg N samples.

| Sample | Haplotype | DYS19 | DYS389I | DYS389II | DYS390 | DYS391 | DYS392 | DYS393 |
| --- | --- | --- | --- | --- | --- | --- | --- | --- |
| Han-Henan | N1a | 14 | 13 | 16 | 23 | 10 | 15 | 13 |
| Han-Henan | N1* | 14 | 13 | 15 | 24 | 11 | 15 | 12 |
| Han-Anhui | N1* | 14 | 14 | 15 | 23 | 11 | 15 | 13 |
| Han-Anhui | N1* | 14 | 14 | 17 | 23 | 11 | 14 | 13 |
| Han-Anhui | N1* | 14 | 14 | 17 | 23 | 10 | 14 | 14 |
| Han-Anhui | N1* | 14 | 14 | 17 | 22 | 10 | 14 | 13 |
| Han-Shandong | N1a | 14 | 14 | 16 | 23 | 10 | 15 | 13 |
| Han-Shandong | N1* | 15 | 13 | 16 | 22 | 10 | 14 | 13 |
| Han-Shandong | N1* | 14 | 13 | 16 | 22 | 10 | 14 | 14 |
| Han-Shandong | N1a | 14 | 13 | 16 | 23 | 10 | 14 | 13 |
| Han-Shandong | N1* | 14 | 13 | 15 | 24 | 10 | 16 | 13 |
| Han-Shandong | N1* | 14 | 13 | 16 | 23 | 10 | 14 | 13 |
| Han-Shandong | N1* | 14 | 14 | 16 | 23 | 10 | 14 | 13 |
| Han-Shandong | N1* | 14 | 13 | 15 | 24 | 11 | 15 | 13 |
| Han-Shandong | N1a | 14 | 13 | 16 | 23 | 10 | 15 | 13 |
| Han-shanxi | N1* | 14 | 13 | 15 | 25 | 11 | 15 | 13 |
| Han-shanxi | N1* | 14 | 14 | 16 | 22 | 10 | 14 | 13 |
| Han-shanxi | N1c | 14 | 13 | 12 | 23 | 11 | 14 | 13 |
| Han-shanxi | N1* | 14 | 14 | 15 | 23 | 12 | 15 | 13 |
| Han-shanxi | N1* | 14 | 14 | 16 | 22 | 10 | 14 | 13 |
| Han-shanxi | N1c | 14 | 13 | 15 | 23 | 11 | 14 | 13 |
| Han-shanxi | N1c | 14 | 13 | 16 | 23 | 12 | 14 | 13 |
| Han-shanxi | N1* | 14 | 14 | 17 | 23 | 10 | 15 | 13 |
| Han-shanxi | N1c | 14 | 13 | 16 | 23 | 11 | 14 | 13 |
| Han-shanxi | N1c | 14 | 13 | 16 | 23 | 12 | 14 | 13 |
| Han-shanxi | N1* | 14 | 13 | 15 | 25 | 10 | 15 | 13 |
| Han-Jilin | N1* | 15 | 14 | 16 | 23 | 10 | 14 | 14 |
| Han-Jilin | N1* | 15 | 14 | 17 | 23 | 10 | 14 | 13 |
| Han-Heilongjiang | N1* | 13 | 13 | 15 | 23 | 10 | 15 | 13 |
| Han-Heilongjiang | N1c | 14 | 14 | 16 | 23 | 11 | 16 | 13 |
| Mongolian | N1b | 14 | 13 | 15 | 23 | 10 | 14 | 13 |
| Korean | N1a | 14 | 13 | 16 | 23 | 10 | 15 | 13 |
| Manchuri | N1* | 14 | 13 | 17 | 22 | 10 | 14 | 13 |
| Manchuri | N1c | 14 | 14 | 16 | 23 | 10 | 14 | 14 |
| Manchuri | N1c | 14 | 14 | 17 | 23 | 10 | 14 | 14 |
| Han-Guizhou | N1* | 14 | 14 | 16 | 23 | 10 | 15 | 13 |
| Dong | N* | 14 | 14 | 17 | 23 | 10 | 14 | 14 |
| Bai | N* | 14 | 14 | 17 | 23 | 10 | 14 | 13 |
| Li | N* | 14 | 13 | 16 | 23 | 10 | 14 | 13 |
| She | N1c | 14 | 14 | 16 | 23 | 11 | 14 | 13 |
| Han-Jilin | N1* | 15 | 13 | 15 | 22 | 10 | 15 | 14 |
| Han-Gansu | N1c | 14 | 13 | 16 | 23 | 11 | 16 | 14 |
| Han-Gansu | N1* | 15 | 13 | 16 | 21 | 10 | 15 | 13 |
| Han-Gansu | N1* | 14 | 14 | 18 | 24 | 10 | 14 | 13 |
| Han-Gansu | N1* | 15 | 14 | 16 | 22 | 10 | 14 | 13 |
| Han-Gansu | N1* | 14 | 14 | 16 | 22 | 10 | 14 | 14 |
| Han-Zhejiang | N1* | 14 | 14 | 16 | 23 | 10 | 14 | 14 |
| Han-Zhejiang | N1* | 14 | 14 | 17 | 23 | 10 | 14 | 13 |
| Han-Zhejiang | N1* | 14 | 13 | 17 | 21 | 10 | 15 | 13 |
| Han-Yunnan | N* | 14 | 14 | 16 | 23 | 10 | 14 | 13 |
| Han-Hubei | N1* | 14 | 14 | 18 | 23 | 10 | 14 | 13 |
| Han-Hubei | N* | 14 | 13 | 17 | 23 | 10 | 14 | 13 |
| Han-Hunan | N1* | 14 | 14 | 17 | 22 | 10 | 14 | 13 |
| Hani | N1* | 14 | 14 | 16 | 23 | 11 | 14 | 13 |
| Naxi | N1* | 14 | 14 | 16 | 23 | 11 | 14 | 13 |
| Yi | N1* | 14 | 14 | 17 | 23 | 11 | 14 | 13 |
| Bai | N1c | 15 | 14 | 16 | 23 | 11 | 14 | 13 |
| Naxi | N1* | 14 | 14 | 17 | 23 | 11 | 14 | 13 |
| Lisu | N1* | 14 | 13 | 15 | 25 | 11 | 16 | 13 |
| Hui | N1* | 14 | 14 | 15 | 23 | 10 | 14 | 13 |
| Han-Yunnan | N* | 14 | 14 | 16 | 23 | 10 | 14 | 13 |
| Yi | N1* | 14 | 14 | 17 | 23 | 11 | 14 | 13 |
| Yi | N1c | 15 | 14 | 16 | 23 | 11 | 14 | 13 |
| Yi | N1c | 14 | 14 | 16 | 24 | 11 | 14 | 13 |
| Bai | N1* | 14 | 14 | 17 | 23 | 11 | 14 | 13 |
| Hani | N1* | 14 | 14 | 15 | 23 | 11 | 14 | 13 |
| Han-Yunnan | N1* | 14 | 13 | 16 | 23 | 10 | 14 | 13 |
| Yi | N1* | 14 | 14 | 15 | 23 | 10 | 14 | 13 |
| Hani | N1a | 14 | 13 | 16 | 23 | 10 | 15 | 13 |
| Hui | N1* | 14 | 14 | 17 | 24 | 11 | 14 | 13 |
| Li | N1* | 13 | 13 | 17 | 22 | 10 | 14 | 14 |
| Li | N* | 14 | 14 | 17 | 23 | 11 | 14 | 13 |
| Yao | N1a | 14 | 13 | 16 | 23 | 10 | 15 | 13 |
| Zhuang | N* | 14 | 14 | 17 | 23 | 11 | 14 | 13 |
| Han-Guizhou | N1c | 17 | 15 | 16 | 23 | 10 | 14 | 13 |
| Gelo | N1* | 14 | 14 | 17 | 24 | 10 | 14 | 13 |
| Han-Guizhou | N* | 14 | 14 | 18 | 23 | 10 | 14 | 13 |
| Buyi | N1* | 14 | 14 | 16 | 22 | 10 | 14 | 13 |
| Miao | N1c | 14 | 14 | 16 | 23 | 11 | 14 | 13 |
| Han-Guizhou | N1c | 14 | 14 | 16 | 23 | 11 | 14 | 13 |
| Han-Guizhou | N1* | 14 | 14 | 17 | 23 | 10 | 14 | 13 |
| Han-Hunan | N1* | 14 | 13 | 16 | 24 | 10 | 15 | 13 |
| Naxi | N1* | 14 | 14 | 16 | 23 | 11 | 14 | 13 |
| Dong | N1* | 15 | 14 | 16 | 23 | 11 | 14 | 13 |
| Han-Guizhou | N1c | 14 | 15 | 16 | 23 | 10 | 14 | 13 |
| Han-Guizhou | N1* | 14 | 14 | 14 | 24 | 10 | 14 | 13 |
| Han-Guizhou | N1* | 14 | 13 | 16 | 21 | 11 | 15 | 13 |
| Han-Hunan | N* | 14 | 13 | 17 | 23 | 11 | 14 | 13 |
| Han-Fujian | N1c | 16 | 14 | 16 | 23 | 11 | 14 | 13 |
| Han-Fujian | N1* | 15 | 13 | 17 | 22 | 10 | 15 | 13 |
| Han-Fujian | N1b | 14 | 14 | 17 | 22 | 10 | 14 | 13 |
| Han-Fujian | N1* | 13 | 13 | 17 | 22 | 10 | 14 | 14 |
| Han-Fujian | N1* | 13 | 13 | 17 | 22 | 10 | 14 | 14 |
| Han-Fujian | N1* | 15 | 13 | 16 | 22 | 10 | 15 | 13 |
| Han-Hunan | N* | 13 | 14 | 17 | 23 | 12 | 14 | 13 |
| Tujia | N1* | 14 | 15 | 16 | 23 | 10 | 14 | 13 |
| Tujia | N1* | 15 | 13 | 15 | 24 | 10 | 14 | 13 |
| Han-Hubei | N1c | 16 | 14 | 16 | 23 | 10 | 14 | 13 |
| Dong | N1* | 15 | 13 | 16 | 24 | 10 | 14 | 13 |
| Dong | N1c | 14 | 14 | 16 | 24 | 10 | 16 | 13 |
| Dong | N1* | 17 | 13 | 16 | 24 | 10 | 13 | 13 |
| Han-Hunan | N* | 14 | 13 | 16 | 23 | 11 | 14 | 13 |
| Miao | N* | 14 | 13 | 16 | 23 | 10 | 14 | 13 |
| Han-Hunan | N1* | 14 | 15 | 17 | 24 | 11 | 14 | 13 |
| Han-Guizhou | N* | 15 | 14 | 16 | 23 | 10 | 14 | 13 |
| Gelo | N1* | 14 | 15 | 17 | 22 | 10 | 14 | 14 |
| Tujia | N1* | 15 | 14 | 16 | 23 | 10 | 14 | 13 |
| Tujia | N* | 14 | 13 | 16 | 23 | 11 | 14 | 13 |
| Gelo | N1* | 14 | 14 | 17 | 22 | 10 | 14 | 14 |
| Miao | N1* | 14 | 14 | 17 | 22 | 10 | 14 | 13 |
| Li | N1* | 14 | 14 | 15 | 24 | 11 | 15 | 13 |
| Yao | N1* | 15 | 13 | 16 | 24 | 11 | 14 | 13 |
| Zhuang | N* | 14 | 14 | 16 | 24 | 11 | 14 | 13 |
| Zhuang | N* | 14 | 14 | 18 | 23 | 11 | 14 | 13 |
| Zhuang | N* | 14 | 14 | 16 | 23 | 12 | 14 | 13 |
| Han-Zhejiang | N1c | 14 | 14 | 16 | 23 | 11 | 14 | 13 |
| Tujia | N1* | 14 | 14 | 15 | 23 | 10 | 14 | 13 |
| Han-Hubei | N1* | 14 | 14 | 16 | 23 | 11 | 14 | 14 |
| Han-Guizhou | N1a | 14 | 13 | 16 | 23 | 10 | 15 | 13 |
| Han-Guizhou | N* | 14 | 14 | 18 | 23 | 10 | 14 | 13 |
| Han-Guizhou | N1* | 14 | 13 | 18 | 23 | 10 | 14 | 13 |
| Han-Guizhou | N1* | 14 | 14 | 16 | 24 | 10 | 14 | 13 |
| Han-Guizhou | N1* | 14 | 13 | 15 | 24 | 11 | 14 | 13 |
| Han-Guizhou | N1a | 14 | 13 | 16 | 22 | 10 | 14 | 13 |
| Han-Guizhou | N1a | 14 | 13 | 16 | 23 | 12 | 15 | 13 |
| Han-Yunnan | N* | 14 | 14 | 17 | 23 | 10 | 14 | 13 |
| Naxi | N1* | 14 | 14 | 17 | 23 | 11 | 14 | 13 |
| Han-Hunan | N1a | 14 | 13 | 16 | 23 | 10 | 16 | 13 |
| Han-Sichuan | N1* | 14 | 14 | 16 | 23 | 10 | 14 | 13 |
| Han-Sichuan | N1* | 13 | 13 | 17 | 22 | 10 | 14 | 14 |
| Han-Sichuan | N1c | 14 | 14 | 16 | 23 | 11 | 14 | 13 |
| Han-Chongqing | N1* | 14 | 14 | 17 | 23 | 10 | 14 | 13 |
| Han-Gansu | N1* | 14 | 14 | 16 | 22 | 10 | 14 | 14 |
| Han-Gansu | N1* | 15 | 14 | 17 | 24 | 10 | 14 | 13 |
| Han-Gansu | N1c | 14 | 14 | 16 | 23 | 11 | 14 | 13 |
| Han-Gansu | N1* | 15 | 13 | 16 | 24 | 10 | 14 | 14 |
| Han-Gansu | N1* | 14 | 13 | 17 | 23 | 10 | 14 | 13 |
| Han-Gansu | N* | 14 | 13 | 16 | 24 | 11 | 14 | 13 |
| Han-Gansu | N1a | 14 | 13 | 17 | 23 | 10 | 15 | 14 |
| Han-Sichuan | N1* | 14 | 13 | 15 | 24 | 11 | 15 | 13 |
| Han-Gansu | N1c | 15 | 14 | 16 | 23 | 10 | 14 | 13 |
| Han-Gansu | N1* | 14 | 13 | 17 | 23 | 10 | 14 | 13 |
| Han-Jilin | N1a | 14 | 13 | 16 | 23 | 10 | 15 | 13 |
| Han-Liaoning | N1c | 14 | 14 | 16 | 23 | 11 | 14 | 13 |
| Han-Hunan | N1c | 14 | 14 | 16 | 24 | 11 | 14 | 13 |
| Han-Shandong | N* | 15 | 13 | 16 | 23 | 10 | 15 | 13 |
| Han-Shandong | N1* | 16 | 14 | 14 | 22 | 10 | 14 | 13 |
| Han-Liaoning | N1* | 15 | 14 | 17 | 21 | 11 | 14 | 13 |
| Han-shanxi | N1c | 14 | 14 | 16 | 23 | 10 | 14 | 13 |
| Han-Jilin | N1* | 14 | 14 | 18 | 23 | 10 | 12 | 13 |
| Han-Jilin | N1c | 14 | 14 | 16 | 23 | 10 | 14 | 13 |
| Mongolian | N1* | 14 | 13 | 15 | 23 | 10 | 14 | 14 |
| Uygur | N1c | 14 | 14 | 16 | 24 | 10 | 14 | 13 |
| Uygur | N1c | 14 | 14 | 15 | 23 | 10 | 15 | 13 |
| Han-Zhejiang | N1* | 14 | 13 | 16 | 24 | 10 | 14 | 13 |
| Han-Zhejiang | N1* | 14 | 13 | 15 | 23 | 10 | 14 | 13 |
| Han-Zhejiang | N1* | 14 | 13 | 16 | 24 | 10 | 14 | 13 |
| Han-Zhejiang | N1a | 14 | 13 | 15 | 23 | 10 | 15 | 13 |
| Korean | N1* | 14 | 14 | 16 | 23 | 10 | 14 | 14 |
| Korean | N1b | 14 | 14 | 16 | 23 | 10 | 14 | 14 |
| Korean | N1* | 16 | 14 | 16 | 23 | 10 | 14 | 13 |
| Manchuri | N1* | 14 | 13 | 15 | 23 | 10 | 14 | 13 |
| Manchuri | N1b | 14 | 13 | 16 | 23 | 11 | 15 | 13 |
| Manchuri | N1* | 14 | 13 | 15 | 23 | 10 | 14 | 13 |
| Manchuri | N1c | 14 | 13 | 16 | 23 | 11 | 14 | 13 |
| Manchuri | N1* | 16 | 14 | 17 | 23 | 10 | 15 | 13 |
| Evenk | N1b | 16 | 13 | 16 | 23 | 10 | 14 | 14 |
| Evenk | N1b | 14 | 13 | 16 | 23 | 10 | 14 | 13 |
| Evenk | N1c | 14 | 14 | 16 | 23 | 10 | 14 | 13 |
| Evenk | N1c | 14 | 14 | 16 | 23 | 10 | 14 | 12 |
| Qiang | N1a | 14 | 13 | 16 | 23 | 10 | 15 | 13 |
| Qiang | N1a | 14 | 13 | 16 | 23 | 10 | 15 | 13 |
| Qiang | N1a | 14 | 13 | 16 | 23 | 10 | 15 | 13 |
| Qiang | N1a | 14 | 13 | 16 | 23 | 10 | 15 | 13 |
| Qiang | N1a | 14 | 13 | 16 | 23 | 10 | 15 | 13 |
| Qiang | N1a | 14 | 13 | 16 | 23 | 10 | 15 | 13 |
| Qiang | N1a | 14 | 13 | 16 | 23 | 10 | 15 | 13 |
| Qiang | N1a | 14 | 13 | 16 | 23 | 11 | 15 | 13 |
| Qiang | N1a | 14 | 13 | 16 | 23 | 10 | 15 | 13 |
| Deang | N1* | 14 | 14 | 16 | 23 | 10 | 15 | 13 |
| Deang | N1* | 14 | 14 | 16 | 23 | 10 | 14 | 13 |
| Deang | N1* | 14 | 14 | 16 | 23 | 11 | 14 | 13 |
| Deang | N1* | 14 | 14 | 16 | 23 | 10 | 14 | 13 |
| Deang | N1* | 14 | 14 | 16 | 23 | 11 | 14 | 13 |
| Jingpo | N1* | 14 | 13 | 15 | 22 | 10 | 14 | 13 |
| Jingpo | N1* | 13 | 13 | 15 | 22 | 11 | 14 | 13 |
| Jingpo | N1* | 15 | 14 | 16 | 23 | 11 | 14 | 13 |
| Manchuri | N1* | 14 | 13 | 15 | 23 | 11 | 15 | 13 |
| Manchuri | N1* | 16 | 14 | 17 | 22 | 10 | 16 | 13 |
| Manchuri | N1* | 14 | 13 | 17 | 22 | 10 | 14 | 13 |
| Han-Guangdong | N1* | 16 | 14 | 16 | 20 | 10 | 14 | 14 |
| Han-Guangdong | N1* | 15 | 14 | 16 | 22 | 11 | 14 | 12 |
| Han-Guangdong | N1* | 16 | 14 | 15 | 23 | 11 | 14 | 13 |
| Han-Guangdong | N1* | 14 | 11 | 16 | 23 | 10 | 14 | 13 |
| Han-Sichuan | N1* | 15 | 14 | 18 | 22 | 10 | 14 | 13 |
| Han-Sichuan | N* | 16 | 13 | 16 | 23 | 10 | 13 | 13 |
| Han-Heilongjiang | N1c | 14 | 14 | 16 | 23 | 10 | 14 | 13 |
| Han-Heilongjiang | N1* | 14 | 14 | 16 | 23 | 10 | 14 | 13 |
| Han-Heilongjiang | N1* | 14 | 14 | 15 | 23 | 10 | 14 | 12 |
| Han-Heilongjiang | N1* | 14 | 14 | 15 | 24 | 11 | 14 | 13 |
| Hani | N1* | 15 | 13 | 15 | 23 | 10 | 14 | 13 |
| Hani | N1* | 14 | 13 | 15 | 23 | 10 | 14 | 13 |
| Hani | N1* | 14 | 14 | 16 | 23 | 10 | 14 | 13 |
| Hani | N1* | 14 | 13 | 15 | 23 | 10 | 14 | 13 |
| Hani | N1* | 14 | 14 | 15 | 23 | 10 | 14 | 13 |
| Hani | N1* | 14 | 13 | 15 | 23 | 10 | 14 | 13 |
| uygur | N1* | 14 | 13 | 17 | 23 | 10 | 14 | 13 |
| uygur | N1* | 14 | 15 | 16 | 22 | 10 | 14 | 13 |
| uygur | N* | 14 | 13 | 16 | 24 | 10 | 12 | 13 |
| Hui | N1* | 14 | 13 | 13 | 21 | 9 | 15 | 13 |
| Hui | N* | 14 | 13 | 16 | 23 | 10 | 14 | 13 |
| Hui | N1* | 14 | 15 | 16 | 22 | 10 | 14 | 13 |
| Hui | N1* | 14 | 13 | 17 | 23 | 10 | 14 | 13 |
| Hui | N1b | 14 | 13 | 15 | 23 | 10 | 14 | 13 |
| Manchuri | N1* | 14 | 13 | 15 | 23 | 11 | 15 | 13 |
| Manchuri | N1a | 14 | 14 | 16 | 23 | 10 | 14 | 13 |
| Manchuri | N1a | 14 | 13 | 16 | 23 | 9 | 15 | 13 |
| Cambodia | N1* | 16 | 12 | 17 | 22 | 10 | 15 | 13 |
| Tibetan | N* | 16 | 14 | 17 | 23 | 10 | 14 | 13 |
| Tibetan | N1a | 14 | 14 | 16 | 23 | 10 | 15 | 13 |
| Tibetan | N1a | 14 | 13 | 17 | 22 | 10 | 15 | 13 |
| Tibetan | N1b | 14 | 14 | 16 | 23 | 10 | 14 | 13 |
| Tibetan | N1c | 14 | 13 | 16 | 23 | 11 | 16 | 14 |
| Tibetan | N1c | 14 | 14 | 15 | 24 | 10 | 14 | 13 |
| Tibetan | N1c | 14 | 13 | 16 | 23 | 11 | 16 | 14 |
| Tibetan | N1c | 16 | 12 | 15 | 24 | 10 | 14 | 13 |
| Tibetan | N1c | 16 | 12 | 15 | 24 | 10 | 14 | 13 |
| Tibetan | N1c | 14 | 14 | 16 | 23 | 11 | 16 | 14 |
| Tibetan | N1c | 16 | 12 | 15 | 24 | 10 | 14 | 13 |
| Tibetan | N1c | 14 | 14 | 16 | 23 | 11 | 16 | 14 |
| Tibetan | N1c | 14 | 14 | 16 | 23 | 11 | 16 | 14 |
| Tibetan | N1c | 15 | 12 | 14 | 24 | 10 | 14 | 13 |
| Tibetan | N1* | 15 | 14 | 15 | 24 | 10 | 14 | 13 |
| Tibetan | N1* | 14 | 14 | 17 | 25 | 10 | 15 | 13 |
| Tibetan | N1* | 14 | 14 | 17 | 25 | 10 | 15 | 13 |
| Tibetan | N1* | 14 | 14 | 16 | 24 | 11 | 14 | 13 |
| Tibetan | N1* | 14 | 13 | 15 | 24 | 11 | 14 | 13 |
| Tibetan | N1* | 14 | 13 | 15 | 24 | 11 | 14 | 13 |
| Tibetan | N1* | 15 | 14 | 15 | 22 | 11 | 14 | 13 |
| Tibetan | N1* | 14 | 15 | 16 | 22 | 11 | 14 | 13 |
| Tibetan | N1* | 13 | 14 | 17 | 23 | 11 | 15 | 13 |
| Tibetan | N1* | 15 | 14 | 15 | 24 | 11 | 14 | 12 |
| Tibetan | N1* | 15 | 14 | 15 | 24 | 11 | 14 | 12 |
| Tibetan | N1* | 15 | 14 | 15 | 24 | 11 | 14 | 12 |
| Tibetan | N1* | 15 | 14 | 15 | 24 | 11 | 14 | 12 |
| Tibetan | N1* | 15 | 14 | 15 | 24 | 11 | 14 | 12 |
| Tibetan | N1* | 15 | 14 | 15 | 24 | 11 | 14 | 12 |
| Tibetan | N1* | 14 | 13 | 17 | 25 | 11 | 14 | 13 |
| Tibetan | N1* | 15 | 14 | 15 | 24 | 11 | 14 | 12 |
| Tibetan | N1* | 14 | 14 | 16 | 24 | 10 | 14 | 13 |
| Tibetan | N1* | 15 | 14 | 15 | 24 | 11 | 14 | 12 |
| Tibetan | N1* | 14 | 14 | 17 | 23 | 11 | 14 | 13 |
| Tibetan | N1* | 15 | 13 | 16 | 23 | 10 | 7 | 13 |
| Tibetan | N1* | 14 | 14 | 15 | 22 | 11 | 14 | 13 |
| Tibetan | N1* | 14 | 14 | 17 | 23 | 11 | 14 | 13 |
| Tibetan | N1* | 14 | 14 | 16 | 24 | 11 | 15 | 13 |
| Tibetan | N1* | 14 | 13 | 16 | 23 | 11 | 14 | 13 |
| Tibetan | N1* | 10 | 13 | 16 | 24 | 11 | 14 | 13 |
| Tibetan | N1* | 14 | 14 | 16 | 24 | 11 | 14 | 13 |
| Tibetan | N1* | 14 | 14 | 16 | 24 | 11 | 14 | 13 |
| Tibetan | N1* | 15 | 14 | 17 | 23 | 11 | 14 | 13 |
| Tibetan | N1* | 13 | 14 | 16 | 23 | 10 | 14 | 13 |
| Tibetan | N1* | 14 | 14 | 17 | 23 | 11 | 14 | 13 |
| Tibetan | N1* | 16 | 14 | 17 | 23 | 10 | 15 | 15 |
| Tibetan | N1* | 14 | 14 | 17 | 24 | 10 | 14 | 13 |
| Tibetan | N1* | 14 | 14 | 16 | 24 | 11 | 14 | 13 |
| Tibetan | N1* | 14 | 14 | 16 | 24 | 11 | 14 | 13 |
| Tibetan | N1* | 15 | 13 | 16 | 22 | 10 | 14 | 13 |
| Tibetan | N1* | 14 | 15 | 16 | 24 | 11 | 14 | 13 |
| Tibetan | N1* | 14 | 14 | 17 | 23 | 10 | 14 | 13 |
| Tibetan | N1* | 14 | 14 | 16 | 24 | 10 | 14 | 13 |
| Tibetan | N1* | 14 | 14 | 16 | 23 | 11 | 13 | 13 |
| Tibetan | N1* | 14 | 14 | 17 | 23 | 11 | 14 | 13 |
| Tibetan | N1* | 14 | 14 | 16 | 24 | 12 | 14 | 13 |
| Tibetan | N1* | 15 | 14 | 15 | 24 | 10 | 14 | 13 |
| Tibetan | N1* | 14 | 14 | 15 | 24 | 11 | 14 | 13 |
| Tibetan | N1* | 14 | 14 | 17 | 23 | 11 | 14 | 13 |
| Tibetan | N1* | 14 | 13 | 16 | 25 | 11 | 14 | 13 |
| Tibetan | N1* | 15 | 13 | 18 | 23 | 10 | 14 | 14 |
| Tibetan | N1* | 14 | 15 | 18 | 23 | 11 | 14 | 13 |
| Tibetan | N1* | 14 | 14 | 16 | 24 | 11 | 14 | 13 |
| Tibetan | N1* | 14 | 14 | 16 | 24 | 10 | 14 | 13 |
| Tibetan | N1* | 14 | 14 | 15 | 24 | 10 | 14 | 13 |
| Tibetan | N1* | 14 | 14 | 16 | 24 | 10 | 14 | 13 |
| Tibetan | N1* | 14 | 14 | 16 | 24 | 11 | 14 | 13 |
| Tibetan | N1* | 14 | 14 | 16 | 24 | 10 | 14 | 13 |
| Tibetan | N1* | 14 | 14 | 16 | 24 | 10 | 14 | 13 |
| Tibetan | N1* | 14 | 14 | 18 | 23 | 11 | 14 | 13 |
| Tibetan | N1* | 14 | 14 | 17 | 23 | 11 | 14 | 13 |
| Tibetan | N1* | 14 | 14 | 17 | 23 | 11 | 14 | 13 |
| Tibetan | N1* | 14 | 13 | 15 | 24 | 10 | 14 | 13 |
| Tibetan | N1* | 14 | 14 | 16 | 23 | 11 | 16 | 14 |
| Tibetan | N1* | 14 | 14 | 16 | 24 | 11 | 14 | 13 |
| Tibetan | N1* | 14 | 14 | 17 | 24 | 10 | 14 | 13 |
| Tibetan | N1* | 14 | 14 | 16 | 23 | 10 | 15 | 13 |
| Tibetan | N1* | 14 | 15 | 17 | 24 | 11 | 14 | 13 |
| Tibetan | N1* | 14 | 13 | 16 | 25 | 11 | 14 | 13 |
| Tibetan | N1* | 15 | 13 | 16 | 24 | 10 | 14 | 13 |
| Tibetan | N1* | 14 | 14 | 16 | 25 | 9 | 14 | 13 |
| Tibetan | N1* | 14 | 13 | 18 | 23 | 10 | 15 | 13 |
| Tibetan | N1* | 14 | 14 | 16 | 24 | 10 | 14 | 13 |
| Tibetan | N1* | 14 | 14 | 14 | 24 | 10 | 14 | 13 |
| Tibetan | N1* | 14 | 14 | 16 | 24 | 11 | 14 | 14 |
| Tibetan | N1* | 15 | 14 | 17 | 23 | 11 | 14 | 13 |
| Tibetan | N1* | 14 | 15 | 17 | 23 | 11 | 14 | 13 |
| Tibetan | N1* | 14 | 14 | 18 | 23 | 10 | 14 | 13 |
| Tibetan | N1* | 14 | 14 | 18 | 23 | 10 | 14 | 13 |
| Tibetan | N1* | 14 | 14 | 16 | 23 | 11 | 14 | 14 |
| Tibetan | N1* | 14 | 14 | 17 | 23 | 10 | 14 | 13 |
| Tibetan | N1* | 14 | 14 | 16 | 23 | 10 | 14 | 13 |
| Tibetan | N1* | 13 | 14 | 16 | 23 | 12 | 14 | 13 |
| Tibetan | N1* | 14 | 14 | 17 | 24 | 10 | 15 | 13 |
| Tibetan | N1* | 14 | 14 | 15 | 25 | 10 | 14 | 13 |
| Tibetan | N1* | 14 | 13 | 16 | 23 | 10 | 7 | 13 |
| Tibetan | N1* | 14 | 13 | 16 | 23 | 11 | 7 | 13 |
| Tibetan | N1* | 14 | 14 | 16 | 24 | 11 | 14 | 13 |
| Tibetan | N1* | 15 | 13 | 17 | 23 | 10 | 14 | 13 |
| Tibetan | N1* | 14 | 14 | 15 | 22 | 11 | 14 | 13 |
| Tibetan | N1* | 14 | 15 | 16 | 24 | 10 | 14 | 13 |
| Tibetan | N1* | 16 | 14 | 16 | 23 | 10 | 15 | 13 |
| Tibetan | N1* | 14 | 14 | 15 | 24 | 10 | 15 | 13 |
| Tibetan | N1* | 15 | 13 | 17 | 23 | 10 | 14 | 13 |
| Tibetan | N1* | 14 | 14 | 16 | 24 | 11 | 14 | 14 |
| Tibetan | N1* | 15 | 13 | 17 | 23 | 10 | 14 | 13 |
| Tibetan | N1* | 14 | 14 | 16 | 24 | 10 | 14 | 13 |
| Tibetan | N1* | 14 | 14 | 16 | 24 | 11 | 14 | 13 |
| Tibetan | N1* | 15 | 13 | 16 | 24 | 10 | 14 | 13 |
| Tibetan | N1* | 14 | 14 | 16 | 24 | 10 | 14 | 13 |
| Tibetan | N1* | 14 | 14 | 16 | 22 | 11 | 15 | 13 |
| Tibetan | N1* | 14 | 14 | 17 | 23 | 10 | 14 | 13 |
| Tibetan | N1* | 14 | 13 | 16 | 25 | 11 | 14 | 13 |
| Tibetan | N1* | 14 | 14 | 16 | 24 | 10 | 14 | 13 |
| Tibetan | N1* | 15 | 13 | 16 | 24 | 10 | 14 | 13 |
| Tibetan | N1* | 14 | 13 | 16 | 23 | 11 | 7 | 13 |
| Tibetan | N1* | 14 | 14 | 16 | 24 | 11 | 14 | 13 |
| Tibetan | N1* | 14 | 14 | 16 | 24 | 10 | 14 | 13 |
| Tibetan | N1* | 14 | 13 | 16 | 23 | 10 | 7 | 13 |
| Tibetan | N1* | 14 | 14 | 17 | 23 | 11 | 14 | 13 |
| Tibetan | N1* | 14 | 14 | 17 | 23 | 11 | 14 | 12 |
| Tibetan | N1* | 15 | 14 | 17 | 22 | 9 | 14 | 13 |
| Tibetan | N1* | 14 | 14 | 16 | 23 | 11 | 14 | 13 |
| Tibetan | N1* | 14 | 14 | 16 | 23 | 11 | 14 | 13 |
| Tibetan | N1* | 14 | 14 | 16 | 23 | 11 | 14 | 13 |
| Tibetan | N1* | 15 | 14 | 17 | 23 | 11 | 14 | 13 |
| Tibetan | N1* | 14 | 14 | 16 | 23 | 11 | 14 | 13 |
| Tibetan | N1* | 15 | 13 | 16 | 24 | 11 | 14 | 13 |
| Tibetan | N1* | 14 | 14 | 17 | 23 | 11 | 14 | 13 |
| Tibetan | N1* | 14 | 14 | 16 | 23 | 10 | 16 | 14 |
| Tibetan | N1* | 14 | 14 | 16 | 23 | 11 | 14 | 13 |
| Tibetan | N1* | 15 | 14 | 16 | 24 | 11 | 14 | 13 |
| Tibetan | N1* | 14 | 13 | 16 | 23 | 10 | 14 | 14 |
| Tibetan | N1* | 15 | 14 | 16 | 23 | 11 | 14 | 13 |
| Tibetan | N1* | 14 | 14 | 17 | 23 | 11 | 14 | 14 |
| Tibetan | N1* | 14 | 14 | 15 | 23 | 11 | 14 | 13 |
| Tibetan | N1* | 14 | 13 | 17 | 24 | 11 | 14 | 13 |
| Tibetan | N1* | 14 | 14 | 16 | 23 | 11 | 14 | 13 |
| Tibetan | N1* | 14 | 14 | 15 | 23 | 11 | 14 | 13 |
| Tibetan | N1* | 15 | 13 | 17 | 23 | 11 | 14 | 13 |
| Tibetan | N1* | 14 | 14 | 16 | 24 | 11 | 14 | 13 |
| Tibetan | N1* | 14 | 14 | 15 | 24 | 10 | 15 | 13 |
| Tibetan | N1* | 14 | 14 | 16 | 24 | 11 | 14 | 13 |
| Tibetan | N1* | 15 | 13 | 17 | 23 | 10 | 14 | 13 |
| Japanese01A | N1* | 14 | 13 | 15 | 24 | 10 | 15 | 13 |
| Japanese02 A | N1* | 15 | 14 | 16 | 23 | 11 | 14 | 13 |
| Japanese03 A | N1* | 13 | 14 | 16 | 22 | 10 | 14 | 13 |
| Japanese04 A | N1c | 14 | 14 | 16 | 22 | 10 | 14 | 13 |
| Laos01B | N1* | 15 | 13 | 16 | 22 | 10 | 14 | 13 |
| Laos02 B | N1c | 14 | 14 | 16 | 23 | 10 | 14 | 13 |
| Laos03 B | N1c | 14 | 14 | 16 | 23 | 10 | 14 | 13 |
| Laos04 B | N1c | 14 | 14 | 16 | 23 | 10 | 14 | 13 |
| Chinese-N*C | N* | 14 | 14 | 17 | 23 | 10 | 14 | 13 |
| Chinese-N* C | N* | 14 | 14 | 16 | 23 | 10 | 13 | 13 |
| Chinese-N* C | N* | 14 | 14 | 17 | 23 | 10 | 16 | 13 |
| Chinese-N* C | N* | 14 | 14 | 15 | 23 | 10 | 14 | 13 |
| Fiji-N* C | N* | 13 | 13 | 17 | 22 | 10 | 14 | 14 |
| Kazah-N1 C | N1a | 14 | 13 | 16 | 22 | 10 | 15 | 13 |
| Kazah-N1 C | N1a | 14 | 13 | 16 | 22 | 10 | 15 | 13 |
| Eskomo-N2 C | N1b | 14 | 13 | 16 | 24 | 10 | 15 | 13 |
| Evenk-N2 C | N1b | 14 | 13 | 16 | 23 | 10 | 14 | 13 |
| Altaian-N2 C | N1b | 14 | 13 | 16 | 23 | 10 | 14 | 13 |
| Evenk-N2 C | N1b | 14 | 13 | 16 | 23 | 10 | 14 | 13 |
| Tuva-N2 C | N1b | 15 | 13 | 16 | 23 | 11 | 14 | 13 |
| Tuva-N2 C | N1b | 15 | 13 | 16 | 23 | 11 | 14 | 13 |
| Tuva-N2 C | N1b | 14 | 13 | 16 | 23 | 10 | 14 | 13 |
| Altaian-N2 C | N1b | 14 | 13 | 16 | 23 | 10 | 15 | 12 |
| Khakash-N2 C | N1b | 14 | 13 | 16 | 23 | 10 | 14 | 13 |
| Komi-N2 C | N1b | 13 | 13 | 18 | 23 | 10 | 12 | 13 |
| Komi-N2 C | N1b | 13 | 13 | 18 | 23 | 10 | 12 | 12 |
| Tatar-N2 C | N1b | 13 | 13 | 17 | 23 | 10 | 12 | 13 |
| Vepsa-N2 C | N1b | 13 | 13 | 18 | 23 | 10 | 11 | 12 |
| Mari-N2 C | N1b | 13 | 13 | 18 | 23 | 10 | 12 | 13 |
| Russian-N2 C | N1b | 13 | 13 | 18 | 23 | 10 | 12 | 13 |
| Udmurt-N3 C | N1c | 14 | 13 | 16 | 23 | 10 | 14 | 13 |
| Komi-N3 C | N1c | 14 | 14 | 15 | 23 | 11 | 14 | 13 |
| Komi-N3 C | N1c | 14 | 14 | 15 | 23 | 10 | 14 | 13 |
| Komi-N3 C | N1c | 14 | 14 | 16 | 23 | 10 | 15 | 13 |
| Komi-N3 C | N1c | 14 | 14 | 16 | 23 | 11 | 14 | 13 |
| Mari –N3 C | N1c | 14 | 14 | 16 | 23 | 10 | 14 | 13 |
| Bashkir-N3 C | N1c | 14 | 13 | 16 | 23 | 11 | 14 | 14 |
| Chuvash-N3 C | N1c | 14 | 14 | 15 | 23 | 10 | 14 | 13 |
| Ukrainian-N3 C | N1c | 15 | 14 | 16 | 23 | 11 | 14 | 14 |
| Russian-N3 C | N1c | 14 | 14 | 16 | 23 | 10 | 14 | 14 |
| Slovak-N3 C | N1c | 15 | 13 | 16 | 23 | 12 | 14 | 14 |
| Slovak-N3 C | N1c | 13 | 14 | 15 | 23 | 11 | 14 | 14 |
| Slovak-N3 C | N1c | 15 | 13 | 16 | 23 | 11 | 14 | 14 |
| Slovak-N3 C | N1c | 14 | 14 | 16 | 24 | 11 | 14 | 14 |
| Estonian-N3 C | N1c | 14 | 14 | 16 | 23 | 11 | 14 | 14 |
| Estonian-N3 C | N1c | 14 | 14 | 16 | 23 | 11 | 14 | 14 |
| Estonian-N3 C | N1c | 14 | 14 | 17 | 23 | 11 | 14 | 14 |
| Estonian-N3 C | N1c | 14 | 14 | 17 | 24 | 11 | 14 | 13 |
| Estonian-N3 C | N1c | 14 | 14 | 17 | 23 | 11 | 14 | 13 |
| Estonian-N3 C | N1c | 15 | 13 | 16 | 23 | 10 | 15 | 14 |
| Karelian-N3 C | N1c | 14 | 14 | 16 | 24 | 11 | 14 | 14 |
| Vepsa-N3 C | N1c | 14 | 14 | 16 | 23 | 10 | 14 | 14 |
| Yakut-N3 C | N1c | 14 | 14 | 18 | 23 | 11 | 16 | 14 |
| Yakut-N3 C | N1c | 14 | 14 | 18 | 23 | 11 | 16 | 14 |
| Yakut-N3 C | N1c | 14 | 14 | 18 | 23 | 11 | 16 | 14 |
| Yakut-N3 C | N1c | 14 | 15 | 18 | 23 | 11 | 16 | 14 |
| Tuva-N3 C | N1c | 14 | 14 | 16 | 23 | 10 | 14 | 14 |
| Tuva-N3 C | N1c | 15 | 14 | 16 | 23 | 11 | 14 | 13 |
| Tuva-N3 C | N1c | 14 | 14 | 16 | 23 | 11 | 14 | 14 |
| Tuva-N3 C | N1c | 15 | 13 | 16 | 23 | 11 | 14 | 13 |
| Altaian-N3 C | N1c | 14 | 14 | 16 | 23 | 10 | 14 | 13 |
| Altaian-N3 C | N1c | 14 | 14 | 16 | 23 | 11 | 14 | 14 |
| Chukchi-N3 C | N1c | 14 | 13 | 17 | 23 | 11 | 14 | 13 |
| Chukchi-N3 C | N1c | 14 | 14 | 16 | 23 | 10 | 14 | 14 |
| Eskimo-N3 C | N1c | 14 | 14 | 16 | 23 | 11 | 14 | 14 |
| Russian01D | N1b | 13 | 13 | 18 | 23 | 10 | 12 | 13 |
| Russian02 D | N1b | 13 | 13 | 19 | 23 | 10 | 12 | 12 |
| Russian03 D | N1b | 13 | 13 | 18 | 24 | 10 | 12 | 13 |
| Russian04 D | N1b | 13 | 13 | 19 | 23 | 10 | 12 | 12 |
| Russian05 D | N1b | 13 | 13 | 19 | 23 | 10 | 12 | 12 |
| Russian06 D | N1b | 13 | 13 | 19 | 23 | 10 | 12 | 12 |
| Russian07 D | N1b | 13 | 13 | 19 | 23 | 10 | 12 | 12 |
| Russian08 D | N1b | 13 | 13 | 19 | 23 | 10 | 12 | 12 |
| Russian09 D | N1b | 13 | 13 | 18 | 24 | 10 | 12 | 13 |
| Russian10 D | N1b | 13 | 13 | 18 | 23 | 10 | 12 | 12 |
| Russian11 D | N1b | 13 | 13 | 19 | 23 | 10 | 12 | 12 |
| Russian12 D | N1b | 13 | 13 | 19 | 23 | 10 | 12 | 12 |
| Russian13 D | N1b | 13 | 13 | 21 | 23 | 10 | 12 | 12 |
| Russian14 D | N1b | 13 | 13 | 18 | 24 | 10 | 12 | 13 |
| Russian15 D | N1b | 13 | 13 | 19 | 23 | 10 | 12 | 12 |
| Russian16 D | N1b | 14 | 13 | 17 | 23 | 10 | 12 | 13 |
| Russian17 D | N1b | 13 | 13 | 18 | 23 | 10 | 12 | 13 |
| Russian18 D | N1b | 13 | 13 | 18 | 23 | 10 | 12 | 13 |
| Russian19 D | N1b | 13 | 13 | 18 | 23 | 11 | 12 | 13 |
| Russian20 D | N1b | 13 | 13 | 19 | 23 | 10 | 12 | 12 |
| Russian21 D | N1b | 13 | 13 | 19 | 23 | 10 | 12 | 12 |
| Russian22 D | N1b | 13 | 13 | 17 | 23 | 10 | 12 | 13 |
| Russian23 D | N1b | 14 | 13 | 18 | 23 | 10 | 12 | 12 |
| Russian24 D | N1b | 13 | 13 | 18 | 23 | 11 | 12 | 12 |
| Russian25 D | N1b | 14 | 13 | 16 | 23 | 10 | 14 | 13 |
| Russian26 D | N1b | 14 | 14 | 16 | 24 | 10 | 14 | 13 |
| Russian27 D | N1b | 14 | 13 | 15 | 23 | 10 | 14 | 13 |
| Russian28 D | N1b | 14 | 13 | 16 | 24 | 10 | 14 | 13 |
| Evenks03E | N1b | 14 | 13 | 16 | 23 | 10 | 14 | 13 |
| Mongolians02E | N1b | 14 | 13 | 16 | 23 | 10 | 14 | 13 |
| Mongolians03E | N1b | 14 | 13 | 16 | 23 | 10 | 14 | 13 |
| Altainans13E | N1b | 14 | 13 | 16 | 23 | 10 | 14 | 13 |
| Tofalars09 E | N1b | 14 | 13 | 16 | 23 | 10 | 14 | 13 |
| Tofalars10 E | N1b | 14 | 13 | 16 | 23 | 10 | 14 | 13 |
| Tofalars11E | N1b | 14 | 13 | 16 | 23 | 10 | 14 | 13 |
| Tofalars12 E | N1b | 14 | 13 | 16 | 23 | 10 | 14 | 13 |
| Khakassians10E | N1b | 14 | 13 | 16 | 23 | 10 | 14 | 13 |
| Khakassians11E | N1b | 14 | 13 | 16 | 23 | 10 | 14 | 13 |
| Khakassians12E | N1b | 14 | 13 | 16 | 23 | 10 | 14 | 13 |
| Khakassians13E | N1b | 14 | 13 | 16 | 23 | 10 | 14 | 13 |
| Khakassians14E | N1b | 14 | 13 | 16 | 23 | 10 | 14 | 13 |
| Khakassians15E | N1b | 14 | 13 | 16 | 23 | 10 | 14 | 13 |
| Khakassians16E | N1b | 14 | 13 | 16 | 23 | 10 | 14 | 13 |
| Shors02 E | N1b | 14 | 13 | 16 | 23 | 10 | 14 | 13 |
| Shors03 E | N1b | 14 | 13 | 16 | 23 | 10 | 14 | 13 |
| Shors04 E | N1b | 14 | 13 | 16 | 23 | 10 | 14 | 13 |
| Shors05 E | N1b | 14 | 13 | 16 | 23 | 10 | 14 | 13 |
| Shors06 E | N1b | 14 | 13 | 16 | 23 | 10 | 14 | 13 |
| Shors07 E | N1b | 14 | 13 | 16 | 23 | 10 | 14 | 13 |
| Buryats42 E | N1b | 14 | 13 | 16 | 22 | 10 | 14 | 13 |
| Evenks04 E | N1b | 14 | 13 | 16 | 23 | 10 | 14 | 13 |
| Evenks05 E | N1b | 14 | 13 | 16 | 23 | 10 | 14 | 13 |
| Evenks06 E | N1b | 14 | 13 | 16 | 23 | 10 | 14 | 13 |
| Evenks07 E | N1b | 14 | 13 | 16 | 23 | 10 | 14 | 13 |
| Evenks08 E | N1b | 14 | 13 | 16 | 23 | 10 | 14 | 13 |
| Evenks09 E | N1b | 14 | 13 | 16 | 23 | 10 | 14 | 13 |
| Evenks10 E | N1b | 14 | 13 | 16 | 23 | 10 | 14 | 13 |
| Evenks11 E | N1b | 14 | 13 | 16 | 23 | 10 | 14 | 13 |
| Tofalars13 E | N1b | 14 | 13 | 16 | 23 | 10 | 14 | 13 |
| Tofalars14 E | N1b | 14 | 13 | 16 | 23 | 10 | 14 | 13 |
| Tofalars15 E | N1b | 14 | 13 | 16 | 23 | 10 | 14 | 13 |
| Khakassians17 E | N1b | 14 | 13 | 16 | 23 | 10 | 14 | 13 |
| Khakassians18 E | N1b | 14 | 13 | 16 | 23 | 10 | 14 | 13 |
| Khakassians19 E | N1b | 14 | 13 | 16 | 23 | 10 | 14 | 13 |
| Khakassians20 E | N1b | 14 | 13 | 16 | 23 | 10 | 14 | 13 |
| Khakassians21 E | N1b | 14 | 13 | 16 | 23 | 10 | 14 | 13 |
| Khakassians22 E | N1b | 14 | 13 | 16 | 23 | 10 | 14 | 13 |
| Khakassians23 E | N1b | 14 | 13 | 16 | 23 | 10 | 14 | 13 |
| Evenks12 E | N1b | 14 | 13 | 16 | 23 | 10 | 14 | 13 |
| Khakassians24 E | N1b | 14 | 13 | 16 | 23 | 10 | 14 | 13 |
| Khakassians25 E | N1b | 14 | 13 | 16 | 23 | 10 | 14 | 13 |
| Khakassians26 E | N1b | 14 | 13 | 15 | 23 | 10 | 15 | 13 |
| Khakassians27 E | N1b | 14 | 13 | 17 | 22 | 10 | 14 | 13 |
| Khakassians28 E | N1b | 14 | 13 | 17 | 24 | 10 | 14 | 13 |
| Khakassians29 E | N1b | 14 | 13 | 16 | 23 | 10 | 14 | 13 |
| Khakassians30 E | N1b | 14 | 13 | 17 | 23 | 10 | 14 | 13 |
| Kalmyks01 E | N1b | 14 | 13 | 15 | 23 | 10 | 14 | 13 |
| Mongolians04 E | N1b | 14 | 13 | 16 | 24 | 10 | 14 | 13 |
| Tuvinians16 E | N1b | 14 | 13 | 16 | 24 | 10 | 14 | 13 |
| Khakassians31 E | N1b | 14 | 13 | 16 | 23 | 11 | 14 | 13 |
| Tuvinians17 E | N1b | 15 | 13 | 16 | 23 | 11 | 14 | 13 |
| Tuvinians18 E | N1b | 15 | 13 | 16 | 23 | 11 | 14 | 13 |
| Tuvinians19 E | N1b | 15 | 13 | 16 | 23 | 11 | 14 | 13 |
| Tuvinians20 E | N1b | 15 | 13 | 16 | 23 | 11 | 14 | 13 |
| Tuvinians21 E | N1b | 15 | 13 | 16 | 23 | 11 | 14 | 13 |
| Tuvinians22 E | N1b | 15 | 13 | 16 | 23 | 11 | 14 | 13 |
| Tuvinians23 E | N1b | 15 | 13 | 16 | 23 | 11 | 14 | 13 |
| Tuvinians24 E | N1b | 15 | 13 | 16 | 23 | 11 | 14 | 13 |
| Tuvinians25 E | N1b | 15 | 13 | 16 | 23 | 11 | 14 | 13 |
| Tuvinians26 E | N1b | 15 | 13 | 16 | 23 | 11 | 14 | 13 |
| Tuvinians27 E | N1b | 15 | 13 | 16 | 23 | 11 | 14 | 13 |
| Tuvinians28 E | N1b | 15 | 13 | 16 | 23 | 11 | 14 | 13 |
| Tuvinians29 E | N1b | 15 | 13 | 16 | 23 | 11 | 14 | 13 |
| Tuvinians30 E | N1b | 15 | 13 | 16 | 23 | 11 | 14 | 13 |
| Tuvinians31 E | N1b | 15 | 13 | 16 | 23 | 11 | 14 | 13 |
| Kalmyks02 E | N1b | 15 | 13 | 16 | 23 | 11 | 14 | 13 |
| Tuvinians32 E | N1b | 15 | 13 | 16 | 23 | 11 | 14 | 14 |
| Tuvinians33 E | N1b | 15 | 13 | 16 | 23 | 10 | 14 | 13 |
| Tuvinians34 E | N1b | 15 | 13 | 16 | 23 | 11 | 14 | 13 |
| Tuvinians35 E | N1b | 15 | 13 | 16 | 23 | 11 | 14 | 13 |
| Tofalars16 E | N1b | 15 | 13 | 16 | 23 | 11 | 14 | 13 |
| Tofalars17 E | N1b | 15 | 13 | 16 | 23 | 11 | 14 | 13 |
| Tofalars18 E | N1b | 15 | 13 | 16 | 23 | 11 | 14 | 13 |
| Tofalars19 E | N1b | 15 | 13 | 16 | 23 | 11 | 14 | 13 |
| Tofalars20 E | N1b | 15 | 13 | 16 | 23 | 11 | 14 | 13 |
| Tofalars21 E | N1b | 15 | 13 | 16 | 23 | 11 | 14 | 13 |
| Tuvinians36 E | N1b | 15 | 13 | 16 | 22 | 11 | 14 | 13 |
| Tuvinians37 E | N1b | 15 | 12 | 16 | 23 | 11 | 14 | 13 |
| Tuvinians38 E | N1b | 15 | 13 | 17 | 23 | 11 | 14 | 13 |
| Tuvinians39 E | N1b | 15 | 13 | 17 | 23 | 11 | 14 | 13 |
| Tuvinians40 E | N1b | 15 | 13 | 16 | 23 | 11 | 15 | 13 |
| Russians47 E | N1b | 13 | 13 | 17 | 23 | 10 | 12 | 13 |
| Russian01 E | N1c | 14 | 13 | 16 | 23 | 11 | 14 | 13 |
| Russian02 E | N1c | 15 | 13 | 16 | 23 | 11 | 14 | 14 |
| Russian03 E | N1c | 15 | 13 | 16 | 23 | 11 | 14 | 14 |
| Russian04 E | N1c | 15 | 13 | 16 | 23 | 11 | 14 | 14 |
| Russian05 E | N1c | 15 | 13 | 16 | 23 | 11 | 14 | 14 |
| Russian06 E | N1c | 15 | 13 | 16 | 23 | 11 | 14 | 14 |
| Russian07 E | N1c | 14 | 14 | 17 | 24 | 11 | 14 | 14 |
| Russian08 E | N1c | 15 | 13 | 16 | 23 | 10 | 14 | 14 |
| Russian09 E | N1c | 15 | 13 | 16 | 23 | 10 | 14 | 14 |
| Russian10 E | N1c | 14 | 14 | 16 | 23 | 11 | 14 | 14 |
| Russian11 E | N1c | 14 | 14 | 16 | 23 | 11 | 14 | 14 |
| Russian12 E | N1c | 14 | 14 | 16 | 23 | 11 | 14 | 14 |
| Russian13 E | N1c | 14 | 14 | 16 | 23 | 11 | 14 | 14 |
| Russian14 E | N1c | 14 | 14 | 16 | 23 | 11 | 14 | 14 |
| Russian15 E | N1c | 14 | 14 | 16 | 23 | 11 | 14 | 14 |
| Tuvinians01 E | N1c | 14 | 14 | 16 | 23 | 11 | 14 | 14 |
| Tuvinians02 E | N1c | 14 | 14 | 16 | 23 | 11 | 14 | 14 |
| Tuvinians03 E | N1c | 14 | 14 | 16 | 23 | 11 | 14 | 14 |
| Tuvinians04 E | N1c | 14 | 14 | 16 | 23 | 11 | 14 | 14 |
| Tuvinians05 E | N1c | 14 | 14 | 16 | 23 | 11 | 14 | 14 |
| Tuvinians06 E | N1c | 14 | 14 | 16 | 23 | 11 | 14 | 14 |
| Sojots01 E | N1c | 14 | 14 | 16 | 23 | 11 | 14 | 14 |
| Sojots02 E | N1c | 14 | 14 | 16 | 23 | 11 | 14 | 14 |
| Tofalars01 E | N1c | 14 | 14 | 16 | 23 | 11 | 14 | 14 |
| Tofalars02 E | N1c | 14 | 14 | 16 | 23 | 11 | 14 | 14 |
| Tofalars03 E | N1c | 14 | 14 | 16 | 23 | 11 | 14 | 14 |
| Tofalars04 E | N1c | 14 | 14 | 16 | 23 | 11 | 14 | 14 |
| Tofalars05 E | N1c | 14 | 14 | 16 | 23 | 11 | 14 | 14 |
| Tofalars06 E | N1c | 14 | 14 | 16 | 23 | 11 | 14 | 14 |
| Tofalars07 E | N1c | 14 | 14 | 16 | 23 | 11 | 14 | 14 |
| Russian16 E | N1c | 15 | 14 | 16 | 22 | 11 | 14 | 14 |
| Russian17 E | N1c | 14 | 13 | 16 | 23 | 11 | 14 | 14 |
| Russian18 E | N1c | 14 | 14 | 16 | 25 | 11 | 14 | 14 |
| Russian19 E | N1c | 14 | 14 | 16 | 25 | 11 | 14 | 14 |
| Russian20 E | N1c | 14 | 14 | 16 | 24 | 11 | 14 | 14 |
| Evenks01 E | N1c | 14 | 14 | 16 | 24 | 11 | 14 | 14 |
| Sojots03 E | N1c | 14 | 14 | 16 | 24 | 11 | 14 | 14 |
| Russian21 E | N1c | 14 | 14 | 16 | 23 | 11 | 14 | 14 |
| Mongolians01 E | N1c | 14 | 14 | 16 | 23 | 11 | 14 | 14 |
| Russian22 E | N1c | 14 | 13 | 16 | 23 | 11 | 13 | 14 |
| Russian23 E | N1c | 14 | 14 | 18 | 23 | 11 | 16 | 14 |
| Yakuts01 E | N1c | 14 | 14 | 18 | 23 | 11 | 16 | 14 |
| Yakuts02 E | N1c | 14 | 14 | 18 | 23 | 11 | 16 | 14 |
| Russian24 E | N1c | 16 | 14 | 16 | 23 | 11 | 14 | 14 |
| Russian25 E | N1c | 14 | 12 | 16 | 23 | 11 | 14 | 14 |
| Russian26 E | N1c | 14 | 14 | 16 | 24 | 11 | 16 | 14 |
| Russian27 E | N1c | 14 | 13 | 16 | 23 | 10 | 14 | 14 |
| Russian28 E | N1c | 14 | 14 | 16 | 23 | 12 | 14 | 14 |
| Russian29 E | N1c | 15 | 14 | 16 | 23 | 11 | 15 | 14 |
| Russian30 E | N1c | 14 | 13 | 16 | 23 | 11 | 14 | 14 |
| Russian31 E | N1c | 14 | 12 | 16 | 22 | 11 | 13 | 14 |
| Russian32 E | N1c | 14 | 12 | 16 | 22 | 11 | 13 | 14 |
| Russian33 E | N1c | 14 | 14 | 16 | 23 | 11 | 14 | 14 |
| Russian34 E | N1c | 14 | 14 | 16 | 23 | 11 | 14 | 14 |
| Russian35 E | N1c | 15 | 14 | 16 | 23 | 11 | 14 | 14 |
| Russian36 E | N1c | 15 | 14 | 16 | 23 | 11 | 14 | 14 |
| Russian37 E | N1c | 15 | 13 | 16 | 23 | 11 | 14 | 14 |
| Khakassians01 E | N1c | 14 | 14 | 16 | 23 | 11 | 14 | 14 |
| Tuvinians07 E | N1c | 14 | 14 | 16 | 23 | 11 | 14 | 14 |
| Tuvinians08 E | N1c | 14 | 14 | 16 | 23 | 11 | 14 | 14 |
| Tuvinians09 E | N1c | 14 | 14 | 16 | 23 | 11 | 14 | 14 |
| Altainans01 E | N1c | 14 | 14 | 16 | 23 | 11 | 14 | 13 |
| Tuvinians10 E | N1c | 14 | 14 | 16 | 23 | 11 | 14 | 14 |
| Koryaks01 E | N1c | 14 | 14 | 14 | 23 | 11 | 14 | 14 |
| Koryaks02 E | N1c | 14 | 14 | 14 | 23 | 11 | 14 | 14 |
| Koryaks03 E | N1c | 14 | 14 | 16 | 23 | 11 | 14 | 14 |
| Koryaks04 E | N1c | 14 | 14 | 16 | 23 | 11 | 14 | 14 |
| Tofalars08 E | N1c | 14 | 14 | 16 | 23 | 11 | 15 | 14 |
| Yakuts03 E | N1c | 14 | 14 | 17 | 23 | 11 | 15 | 14 |
| Yakuts04 E | N1c | 14 | 14 | 17 | 23 | 11 | 15 | 14 |
| Yakuts05 E | N1c | 14 | 14 | 17 | 23 | 11 | 15 | 14 |
| Yakuts06 E | N1c | 14 | 14 | 17 | 23 | 10 | 16 | 14 |
| Evenks02 E | N1c | 14 | 14 | 16 | 23 | 11 | 16 | 14 |
| Yakuts07 E | N1c | 14 | 14 | 18 | 24 | 11 | 16 | 14 |
| Yakuts08 E | N1c | 14 | 14 | 18 | 23 | 11 | 17 | 14 |
| Evens01 E | N1c | 15 | 13 | 16 | 23 | 11 | 14 | 14 |
| Tuvinians11 E | N1c | 15 | 14 | 16 | 23 | 11 | 14 | 13 |
| Tuvinians12 E | N1c | 15 | 14 | 16 | 23 | 11 | 14 | 13 |
| Khakassians02 E | N1c | 15 | 14 | 16 | 23 | 11 | 14 | 13 |
| Khakassians03 E | N1c | 15 | 14 | 16 | 23 | 11 | 14 | 13 |
| Khakassians04 E | N1c | 15 | 14 | 16 | 23 | 11 | 14 | 13 |
| Khakassians05 E | N1c | 15 | 14 | 16 | 23 | 11 | 14 | 13 |
| Khakassians06 E | N1c | 15 | 14 | 16 | 23 | 11 | 14 | 13 |
| Khakassians07 E | N1c | 15 | 14 | 16 | 23 | 11 | 14 | 13 |
| Shors01 E | N1c | 15 | 14 | 16 | 23 | 11 | 14 | 13 |
| Khakassians08 E | N1c | 16 | 14 | 16 | 23 | 10 | 14 | 13 |
| Khakassians09 E | N1c | 16 | 13 | 16 | 23 | 11 | 14 | 13 |
| Khakassians10 E | N1c | 14 | 13 | 16 | 23 | 10 | 14 | 13 |
| Russian38 E | N1c | 14 | 13 | 16 | 23 | 10 | 13 | 13 |
| Russian39 E | N1c | 14 | 14 | 16 | 23 | 10 | 14 | 12 |
| Russian40 E | N1c | 15 | 14 | 18 | 23 | 10 | 14 | 14 |
| Russian41 E | N1c | 14 | 15 | 16 | 23 | 10 | 14 | 14 |
| Russian42 E | N1c | 14 | 14 | 16 | 23 | 10 | 14 | 14 |
| Russian43 E | N1c | 14 | 14 | 16 | 23 | 10 | 14 | 14 |
| Tuvinians13 E | N1c | 14 | 14 | 16 | 23 | 10 | 14 | 14 |
| Tuvinians14 E | N1c | 14 | 14 | 16 | 23 | 10 | 14 | 14 |
| Buryats01 E | N1c | 14 | 14 | 16 | 23 | 10 | 14 | 14 |
| Buryats02 E | N1c | 14 | 14 | 16 | 23 | 10 | 14 | 14 |
| Buryats03 E | N1c | 14 | 14 | 16 | 23 | 10 | 14 | 14 |
| Buryats04 E | N1c | 14 | 14 | 16 | 23 | 10 | 14 | 14 |
| Buryats05 E | N1c | 14 | 14 | 16 | 23 | 10 | 14 | 14 |
| Buryats06 E | N1c | 14 | 14 | 16 | 23 | 10 | 14 | 14 |
| Buryats07 E | N1c | 14 | 14 | 16 | 23 | 10 | 14 | 14 |
| Buryats08 E | N1c | 14 | 14 | 16 | 23 | 10 | 14 | 14 |
| Buryats09 E | N1c | 14 | 14 | 16 | 23 | 10 | 14 | 14 |
| Buryats10 E | N1c | 14 | 14 | 16 | 23 | 10 | 14 | 14 |
| Buryats11 E | N1c | 14 | 14 | 16 | 23 | 10 | 14 | 14 |
| Buryats12 E | N1c | 14 | 14 | 16 | 23 | 10 | 14 | 14 |
| Buryats13 E | N1c | 14 | 14 | 16 | 23 | 10 | 14 | 14 |
| Buryats14 E | N1c | 14 | 14 | 16 | 23 | 10 | 14 | 14 |
| Buryats15 E | N1c | 14 | 14 | 16 | 23 | 10 | 14 | 14 |
| Buryats16 E | N1c | 14 | 14 | 16 | 23 | 10 | 14 | 14 |
| Buryats17 E | N1c | 14 | 14 | 16 | 23 | 10 | 14 | 14 |
| Buryats18 E | N1c | 14 | 14 | 16 | 23 | 10 | 14 | 14 |
| Buryats19 E | N1c | 14 | 14 | 16 | 23 | 10 | 14 | 14 |
| Buryats20 E | N1c | 14 | 14 | 16 | 23 | 10 | 14 | 14 |
| Buryats21 E | N1c | 14 | 14 | 16 | 23 | 10 | 14 | 14 |
| Buryats22 E | N1c | 14 | 14 | 16 | 23 | 10 | 14 | 14 |
| Buryats23 E | N1c | 14 | 14 | 16 | 23 | 10 | 14 | 14 |
| Buryats24 E | N1c | 14 | 14 | 16 | 23 | 10 | 14 | 14 |
| Buryats25 E | N1c | 14 | 14 | 16 | 23 | 10 | 14 | 14 |
| Buryats26 E | N1c | 14 | 14 | 16 | 23 | 10 | 14 | 14 |
| Buryats27 E | N1c | 14 | 14 | 16 | 23 | 10 | 14 | 14 |
| Buryats28 E | N1c | 14 | 14 | 16 | 23 | 10 | 14 | 14 |
| Buryats29 E | N1c | 14 | 14 | 16 | 23 | 10 | 14 | 14 |
| Buryats30 E | N1c | 14 | 14 | 16 | 23 | 10 | 14 | 14 |
| Buryats31 E | N1c | 14 | 14 | 16 | 23 | 10 | 14 | 14 |
| Russian44 E | N1c | 14 | 14 | 16 | 24 | 10 | 14 | 14 |
| Russian45 E | N1c | 14 | 14 | 16 | 24 | 10 | 14 | 14 |
| Russian46 E | N1c | 14 | 14 | 16 | 24 | 10 | 14 | 13 |
| Buryats32 E | N1c | 14 | 14 | 16 | 23 | 10 | 13 | 14 |
| Buryats33 E | N1c | 14 | 14 | 16 | 23 | 10 | 14 | 13 |
| Buryats34 E | N1c | 14 | 14 | 16 | 23 | 10 | 14 | 13 |
| Buryats35 E | N1c | 14 | 14 | 15 | 23 | 10 | 14 | 14 |
| Buryats36 E | N1c | 14 | 14 | 15 | 23 | 10 | 14 | 14 |
| Buryats37 E | N1c | 14 | 14 | 17 | 23 | 10 | 14 | 14 |
| Buryats38 E | N1c | 14 | 14 | 17 | 23 | 10 | 14 | 14 |
| Altainans02 E | N1c | 14 | 13 | 18 | 23 | 10 | 14 | 14 |
| Altainans03 E | N1c | 14 | 13 | 18 | 23 | 10 | 14 | 14 |
| Altainans04 E | N1c | 14 | 13 | 18 | 23 | 10 | 14 | 14 |
| Altainans05 E | N1c | 14 | 13 | 18 | 23 | 10 | 14 | 14 |
| Altainans06 E | N1c | 14 | 13 | 18 | 23 | 10 | 14 | 14 |
| Altainans07 E | N1c | 14 | 13 | 18 | 23 | 10 | 14 | 14 |
| Altainans08 E | N1c | 14 | 13 | 18 | 23 | 10 | 14 | 14 |
| Altainans09 E | N1c | 14 | 13 | 18 | 23 | 10 | 14 | 14 |
| Altainans10 E | N1c | 14 | 13 | 18 | 23 | 10 | 14 | 14 |
| Altainans11 E | N1c | 14 | 13 | 18 | 23 | 10 | 14 | 14 |
| Buryats39 E | N1c | 14 | 14 | 16 | 23 | 10 | 14 | 15 |
| Altainans12 E | N1c | 14 | 14 | 16 | 23 | 10 | 14 | 13 |
| Buryats40 E | N1c | 14 | 13 | 16 | 23 | 10 | 14 | 13 |
| Buryats41 E | N1c | 15 | 14 | 16 | 23 | 10 | 14 | 14 |
| Tuvinians15 E | N1c | 15 | 14 | 16 | 23 | 10 | 13 | 14 |
| S Karelia01F | N1c | 14 | 13 | 16 | 25 | 10 | 14 | 14 |
| S Karelia02 | N1c | 14 | 14 | 16 | 24 | 11 | 14 | 14 |
| S Karelia03 F | N1c | 14 | 14 | 16 | 24 | 11 | 14 | 14 |
| S Karelia04 F | N1c | 14 | 14 | 16 | 24 | 11 | 14 | 14 |
| S Karelia05 F | N1c | 14 | 14 | 16 | 24 | 11 | 14 | 14 |
| S Karelia06 F | N1c | 14 | 14 | 16 | 24 | 11 | 14 | 14 |
| S Karelia07 F | N1c | 14 | 14 | 16 | 24 | 11 | 14 | 14 |
| S Karelia08 F | N1c | 14 | 14 | 16 | 24 | 11 | 14 | 14 |
| S Karelia09 F | N1c | 14 | 14 | 16 | 24 | 11 | 14 | 14 |
| S Karelia10 F | N1c | 14 | 14 | 16 | 24 | 11 | 14 | 14 |
| S Karelia11 F | N1c | 14 | 14 | 16 | 24 | 11 | 14 | 14 |
| N Karelia01 F | N1c | 14 | 14 | 16 | 24 | 11 | 14 | 14 |
| N Karelia02 F | N1c | 14 | 14 | 16 | 24 | 11 | 14 | 14 |
| N Karelia03 F | N1c | 14 | 14 | 16 | 24 | 11 | 14 | 14 |
| N Savo01 F | N1c | 14 | 14 | 16 | 24 | 11 | 14 | 14 |
| N Savo02 F | N1c | 14 | 14 | 16 | 24 | 11 | 14 | 14 |
| N Savo03 F | N1c | 14 | 14 | 16 | 24 | 11 | 14 | 14 |
| N Savo04 F | N1c | 14 | 14 | 16 | 24 | 11 | 14 | 14 |
| N Savo05 F | N1c | 14 | 14 | 16 | 24 | 11 | 14 | 14 |
| N Savo06 F | N1c | 14 | 14 | 16 | 24 | 11 | 14 | 14 |
| N Savo07 F | N1c | 14 | 14 | 16 | 24 | 11 | 14 | 14 |
| N Savo08 F | N1c | 14 | 14 | 16 | 24 | 11 | 14 | 14 |
| N Savo09 F | N1c | 14 | 14 | 16 | 24 | 11 | 14 | 14 |
| N Savo10 F | N1c | 14 | 14 | 16 | 24 | 11 | 14 | 14 |
| N Savo11 F | N1c | 14 | 14 | 16 | 24 | 11 | 14 | 14 |
| N Ostrobothnia01 F | N1c | 14 | 14 | 16 | 24 | 11 | 14 | 14 |
| N Ostrobothnia02 F | N1c | 14 | 14 | 16 | 24 | 11 | 14 | 14 |
| N Ostrobothnia03 F | N1c | 14 | 14 | 16 | 24 | 11 | 14 | 14 |
| N Ostrobothnia04 F | N1c | 14 | 14 | 16 | 24 | 11 | 14 | 14 |
| N Ostrobothnia05 F | N1c | 14 | 14 | 16 | 24 | 11 | 14 | 14 |
| N Ostrobothnia06 F | N1c | 14 | 14 | 16 | 24 | 11 | 14 | 14 |
| N Ostrobothnia07 F | N1c | 14 | 14 | 16 | 24 | 11 | 14 | 14 |
| N Ostrobothnia08 F | N1c | 14 | 14 | 16 | 24 | 11 | 14 | 14 |
| N Ostrobothnia09 F | N1c | 14 | 14 | 16 | 24 | 11 | 14 | 14 |
| N Ostrobothnia10 F | N1c | 14 | 14 | 16 | 24 | 11 | 14 | 14 |
| N Ostrobothnia11 F | N1c | 14 | 14 | 16 | 24 | 11 | 14 | 14 |
| N Ostrobothnia12 F | N1c | 14 | 14 | 16 | 24 | 11 | 14 | 14 |
| N Ostrobothnia13 F | N1c | 14 | 14 | 16 | 24 | 11 | 14 | 14 |
| N Ostrobothnia14 F | N1c | 14 | 14 | 16 | 24 | 11 | 14 | 14 |
| N Ostrobothnia15 F | N1c | 14 | 14 | 16 | 24 | 11 | 14 | 14 |
| N Ostrobothnia16 F | N1c | 14 | 14 | 16 | 24 | 11 | 14 | 14 |
| N Ostrobothnia17 F | N1c | 14 | 14 | 16 | 24 | 11 | 14 | 14 |
| N Ostrobothnia18 F | N1c | 14 | 14 | 16 | 24 | 11 | 14 | 14 |
| N Ostrobothnia19 F | N1c | 14 | 14 | 16 | 24 | 11 | 14 | 14 |
| N Ostrobothnia20 F | N1c | 14 | 14 | 16 | 24 | 11 | 14 | 14 |
| N Ostrobothnia21 F | N1c | 14 | 14 | 16 | 24 | 11 | 14 | 14 |
| N Ostrobothnia22 F | N1c | 14 | 14 | 16 | 24 | 11 | 14 | 14 |
| N Ostrobothnia23 F | N1c | 14 | 14 | 16 | 24 | 11 | 14 | 14 |
| N Ostrobothnia24 F | N1c | 14 | 14 | 16 | 24 | 11 | 14 | 14 |
| N Ostrobothnia25 F | N1c | 14 | 14 | 16 | 24 | 11 | 14 | 14 |
| N Ostrobothnia26 F | N1c | 14 | 14 | 16 | 24 | 11 | 14 | 14 |
| N Ostrobothnia27 F | N1c | 14 | 14 | 16 | 24 | 11 | 14 | 14 |
| N Ostrobothnia28 F | N1c | 14 | 14 | 16 | 24 | 11 | 14 | 14 |
| N Ostrobothnia29 F | N1c | 14 | 14 | 16 | 24 | 11 | 14 | 14 |
| S Ostrobothnia01 F | N1c | 14 | 14 | 16 | 24 | 11 | 14 | 14 |
| S Ostrobothnia02 F | N1c | 14 | 14 | 16 | 24 | 11 | 14 | 14 |
| S Ostrobothnia03 F | N1c | 14 | 14 | 16 | 24 | 11 | 14 | 14 |
| SS Ostrobothnia01 F | N1c | 14 | 14 | 16 | 24 | 11 | 14 | 14 |
| SS Ostrobothnia02 F | N1c | 14 | 14 | 16 | 24 | 11 | 14 | 14 |
| Hame01 F | N1c | 14 | 14 | 16 | 24 | 11 | 14 | 14 |
| Hame02 F | N1c | 14 | 14 | 16 | 24 | 11 | 14 | 14 |
| Hame03 F | N1c | 14 | 14 | 16 | 24 | 11 | 14 | 14 |
| Hame04 F | N1c | 14 | 14 | 16 | 24 | 11 | 14 | 14 |
| Hame05 F | N1c | 14 | 14 | 16 | 24 | 11 | 14 | 14 |
| SW Finland01 F | N1c | 14 | 14 | 16 | 24 | 11 | 14 | 14 |
| SW Finland02 F | N1c | 14 | 14 | 16 | 24 | 11 | 14 | 14 |
| S Karelia12 F | N1c | 15 | 14 | 16 | 24 | 12 | 14 | 14 |
| S Karelia13 F | N1c | 14 | 14 | 16 | 25 | 12 | 14 | 15 |
| S Karelia14 F | N1c | 15 | 13 | 16 | 23 | 12 | 14 | 13 |
| S Karelia15 F | N1c | 14 | 14 | 16 | 24 | 12 | 14 | 14 |
| S Karelia16 F | N1c | 14 | 14 | 16 | 24 | 12 | 14 | 14 |
| S Karelia17 F | N1c | 14 | 14 | 16 | 24 | 12 | 14 | 14 |
| S Karelia18 F | N1c | 14 | 14 | 16 | 24 | 12 | 14 | 14 |
| S Karelia19 F | N1c | 14 | 14 | 16 | 24 | 12 | 14 | 14 |
| S Karelia20 F | N1c | 14 | 14 | 16 | 24 | 12 | 14 | 14 |
| S Karelia21 F | N1c | 14 | 14 | 16 | 24 | 12 | 14 | 14 |
| N Savo12 F | N1c | 14 | 14 | 16 | 24 | 12 | 14 | 14 |
| N Savo13 F | N1c | 14 | 14 | 16 | 24 | 12 | 14 | 14 |
| N Savo14 F | N1c | 14 | 14 | 16 | 24 | 12 | 14 | 14 |
| N Savo15 F | N1c | 14 | 14 | 16 | 24 | 12 | 14 | 14 |
| N Ostrobothnia30 F | N1c | 14 | 14 | 16 | 24 | 12 | 14 | 14 |
| S Ostrobothnia04 F | N1c | 14 | 14 | 16 | 24 | 12 | 14 | 14 |
| SS Ostrobothnia03 F | N1c | 14 | 14 | 16 | 24 | 12 | 14 | 14 |
| S Karelia22 F | N1c | 14 | 14 | 16 | 24 | 11 | 14 | 12 |
| S Karelia23 F | N1c | 14 | 15 | 16 | 25 | 12 | 14 | 14 |
| S Karelia24 F | N1c | 14 | 14 | 17 | 23 | 12 | 14 | 15 |
| S Karelia25 F | N1c | 14 | 14 | 16 | 24 | 11 | 15 | 14 |
| N Ostrobothnia31 F | N1c | 14 | 14 | 16 | 24 | 11 | 15 | 14 |
| Hame06 F | N1c | 14 | 14 | 16 | 24 | 11 | 15 | 14 |
| S Karelia26 F | N1c | 14 | 13 | 16 | 23 | 12 | 14 | 13 |
| S Karelia27 F | N1c | 14 | 14 | 16 | 24 | 12 | 14 | 14 |
| S Karelia28 F | N1c | 14 | 14 | 16 | 23 | 11 | 14 | 14 |
| N Karelia04 F | N1c | 14 | 14 | 16 | 23 | 11 | 14 | 14 |
| N Savo16 F | N1c | 14 | 14 | 16 | 23 | 11 | 14 | 14 |
| N Ostrobothnia32 F | N1c | 14 | 14 | 16 | 23 | 11 | 14 | 14 |
| N Ostrobothnia33 F | N1c | 14 | 14 | 16 | 23 | 11 | 14 | 14 |
| SS Ostrobothnia04 F | N1c | 14 | 14 | 16 | 23 | 11 | 14 | 14 |
| SS Ostrobothnia05 F | N1c | 14 | 14 | 16 | 23 | 11 | 14 | 14 |
| Hame07 F | N1c | 14 | 14 | 16 | 23 | 11 | 14 | 14 |
| Hame08 F | N1c | 14 | 14 | 16 | 23 | 11 | 14 | 14 |
| Hame09 F | N1c | 14 | 14 | 16 | 23 | 11 | 14 | 14 |
| SW Finland03 F | N1c | 14 | 14 | 16 | 23 | 11 | 14 | 14 |
| SW Finland04 F | N1c | 14 | 14 | 16 | 23 | 11 | 14 | 14 |
| S Karelia29 F | N1c | 15 | 14 | 15 | 24 | 10 | 14 | 14 |
| S Karelia30 F | N1c | 14 | 14 | 16 | 24 | 11 | 14 | 13 |
| S Karelia31 F | N1c | 14 | 14 | 17 | 24 | 11 | 14 | 13 |
| S Karelia32 F | N1c | 14 | 14 | 17 | 24 | 12 | 14 | 14 |
| S Karelia33 F | N1c | 14 | 13 | 18 | 24 | 12 | 14 | 14 |
| S Karelia34 F | N1c | 14 | 13 | 16 | 23 | 12 | 14 | 14 |
| N Karelia05 F | N1c | 15 | 14 | 16 | 24 | 11 | 14 | 14 |
| N Ostrobothnia34 F | N1c | 15 | 14 | 16 | 24 | 11 | 14 | 14 |
| S Ostrobothnia05 F | N1c | 15 | 14 | 16 | 24 | 11 | 14 | 14 |
| N Savo17 F | N1c | 14 | 13 | 16 | 24 | 11 | 14 | 15 |
| S Ostrobothnia06 F | N1c | 14 | 13 | 16 | 24 | 11 | 14 | 15 |
| N Karelia06 F | N1c | 14 | 14 | 16 | 24 | 10 | 14 | 14 |
| N Savo18 F | N1c | 14 | 14 | 16 | 24 | 10 | 14 | 14 |
| N Savo19 F | N1c | 14 | 14 | 16 | 24 | 10 | 14 | 14 |
| N Savo20 F | N1c | 14 | 14 | 16 | 24 | 10 | 14 | 14 |
| N Savo21 F | N1c | 14 | 14 | 16 | 24 | 10 | 14 | 14 |
| S Ostrobothnia07 F | N1c | 14 | 14 | 16 | 24 | 10 | 14 | 14 |
| S Ostrobothnia08 F | N1c | 14 | 14 | 16 | 24 | 10 | 14 | 14 |
| Satakunta01 F | N1c | 14 | 14 | 16 | 24 | 10 | 14 | 14 |
| Hame10 F | N1c | 14 | 14 | 16 | 24 | 10 | 14 | 14 |
| Hame11 F | N1c | 14 | 14 | 16 | 24 | 10 | 14 | 14 |
| SW Finland05 | N1c | 14 | 14 | 16 | 24 | 10 | 14 | 14 |
| S Ostrobothnia09 F | N1c | 14 | 13 | 17 | 24 | 10 | 14 | 14 |
| S Ostrobothnia10 F | N1c | 14 | 12 | 16 | 24 | 11 | 14 | 14 |
| N Ostrobothnia35 F | N1c | 14 | 14 | 16 | 24 | 11 | 14 | 14 |
| N Ostrobothnia36 F | N1c | 14 | 14 | 16 | 24 | 11 | 14 | 14 |
| S Ostrobothnia11 F | N1c | 14 | 14 | 16 | 24 | 11 | 14 | 14 |
| S Ostrobothnia12 F | N1c | 14 | 14 | 16 | 24 | 11 | 14 | 14 |
| S Ostrobothnia13 F | N1c | 14 | 14 | 16 | 24 | 12 | 14 | 14 |
| SW Finland06 F | N1c | 14 | 14 | 16 | 24 | 12 | 14 | 14 |
| N Savo22 F | N1c | 14 | 14 | 17 | 23 | 11 | 14 | 14 |
| S Ostrobothnia14 F | N1c | 14 | 14 | 17 | 23 | 11 | 14 | 14 |
| N Karelia07 F | N1c | 14 | 13 | 16 | 23 | 11 | 14 | 14 |
| N Karelia08 F | N1c | 14 | 13 | 16 | 23 | 11 | 14 | 14 |
| N Ostrobothnia37 F | N1c | 14 | 13 | 16 | 23 | 11 | 14 | 14 |
| N Ostrobothnia38 F | N1c | 14 | 13 | 16 | 23 | 11 | 14 | 14 |
| N Ostrobothnia39 F | N1c | 14 | 13 | 16 | 23 | 11 | 14 | 14 |
| S Ostrobothnia15 F | N1c | 14 | 13 | 16 | 23 | 11 | 14 | 14 |
| SS Ostrobothnia06 F | N1c | 14 | 13 | 16 | 23 | 11 | 14 | 14 |
| Hame12 F | N1c | 14 | 13 | 16 | 23 | 11 | 14 | 14 |
| Hame13 F | N1c | 14 | 13 | 16 | 23 | 11 | 14 | 14 |
| SW Finland07 F | N1c | 14 | 13 | 16 | 23 | 11 | 14 | 14 |
| SW Finland08 F | N1c | 14 | 13 | 16 | 23 | 11 | 14 | 14 |
| SW Finland09 F | N1c | 14 | 13 | 16 | 23 | 11 | 14 | 14 |
| N Karelia09 F | N1c | 14 | 13 | 16 | 24 | 11 | 14 | 14 |
| N Karelia10 F | N1c | 14 | 13 | 16 | 24 | 11 | 14 | 14 |
| N Karelia11 F | N1c | 14 | 13 | 16 | 24 | 11 | 14 | 14 |
| N Savo23 F | N1c | 14 | 13 | 16 | 24 | 11 | 14 | 14 |
| N Savo24 F | N1c | 14 | 13 | 16 | 24 | 11 | 14 | 14 |
| Hame14 F | N1c | 14 | 13 | 16 | 24 | 11 | 14 | 14 |
| Hame15 F | N1c | 14 | 13 | 16 | 24 | 11 | 14 | 14 |
| Hame16 F | N1c | 16 | 11 | 16 | 23 | 11 | 14 | 14 |
| Hame17 F | N1c | 14 | 13 | 16 | 25 | 11 | 14 | 14 |
| Hame18 F | N1c | 15 | 14 | 16 | 23 | 11 | 14 | 13 |
| N Ostrobothnia40 F | N1c | 14 | 13 | 16 | 23 | 11 | 14 | 13 |
| Satakunta02 F | N1c | 14 | 13 | 16 | 23 | 11 | 14 | 13 |
| Satakunta03 F | N1c | 14 | 13 | 16 | 23 | 11 | 14 | 13 |
| Hame19 F | N1c | 14 | 13 | 16 | 23 | 11 | 14 | 13 |
| N Savo25 F | N1c | 14 | 14 | 17 | 24 | 11 | 14 | 14 |
| N Savo26 F | N1c | 14 | 14 | 17 | 24 | 11 | 14 | 14 |
| N Ostrobothnia41 F | N1c | 14 | 14 | 17 | 24 | 11 | 14 | 14 |
| N Ostrobothnia42 F | N1c | 14 | 14 | 17 | 24 | 11 | 14 | 14 |
| N Ostrobothnia43 | N1c | 14 | 14 | 17 | 24 | 11 | 14 | 14 |
| Hame20 F | N1c | 14 | 14 | 17 | 24 | 11 | 14 | 14 |
| Hame21 F | N1c | 15 | 14 | 16 | 24 | 11 | 14 | 14 |
| Hame22 F | N1c | 14 | 14 | 17 | 24 | 11 | 14 | 14 |
| SS Ostrobothnia07 F | N1c | 14 | 13 | 16 | 23 | 10 | 14 | 14 |
| SS Ostrobothnia08 F | N1c | 14 | 13 | 16 | 23 | 10 | 14 | 14 |
| Satakunta04 F | N1c | 14 | 13 | 16 | 23 | 10 | 14 | 14 |
| Satakunta05 F | N1c | 14 | 13 | 16 | 23 | 10 | 14 | 14 |
| Satakunta06 F | N1c | 14 | 13 | 16 | 23 | 10 | 14 | 14 |
| Hame23 F | N1c | 14 | 13 | 16 | 23 | 10 | 14 | 14 |
| SW Finland10 F | N1c | 14 | 13 | 16 | 23 | 10 | 14 | 14 |
| SW Finland11 F | N1c | 14 | 13 | 16 | 23 | 10 | 14 | 14 |
| SW Finland12 F | N1c | 14 | 13 | 16 | 23 | 10 | 14 | 14 |
| SW Finland13 F | N1c | 14 | 13 | 16 | 23 | 10 | 14 | 14 |
| Hame24 F | N1c | 14 | 13 | 16 | 23 | 11 | 14 | 14 |
| Hame25 F | N1c | 15 | 13 | 16 | 22 | 11 | 14 | 14 |
| Hame26 F | N1c | 14 | 13 | 17 | 23 | 11 | 14 | 14 |
| N Ostrobothnia44 F | N1c | 14 | 15 | 16 | 24 | 11 | 14 | 14 |
| Hame27 F | N1c | 14 | 15 | 16 | 24 | 11 | 14 | 14 |
| N Karelia12 F | N1c | 15 | 14 | 16 | 24 | 11 | 14 | 15 |
| N Karelia13 F | N1c | 14 | 13 | 16 | 25 | 11 | 14 | 14 |
| SS Ostrobothnia09 F | N1c | 14 | 13 | 16 | 25 | 11 | 14 | 14 |
| N Karelia14 F | N1c | 14 | 14 | 16 | 24 | 10 | 14 | 15 |
| N Karelia15 F | N1c | 14 | 13 | 17 | 24 | 11 | 14 | 13 |
| N Savo27 F | N1c | 14 | 14 | 16 | 24 | 11 | 14 | 15 |
| N Ostrobothnia45 F | N1c | 14 | 14 | 16 | 24 | 11 | 14 | 15 |
| N Ostrobothnia46 F | N1c | 14 | 14 | 16 | 24 | 11 | 14 | 15 |
| N Savo28 F | N1c | 14 | 14 | 16 | 24 | 11 | 14 | 13 |
| N Ostrobothnia47 F | N1c | 14 | 14 | 16 | 24 | 11 | 14 | 13 |
| N Ostrobothnia48 F | N1c | 14 | 14 | 16 | 24 | 11 | 14 | 13 |
| N Ostrobothnia49 F | N1c | 14 | 15 | 16 | 24 | 11 | 14 | 13 |
| N Ostrobothnia50 F | N1c | 14 | 14 | 16 | 24 | 12 | 14 | 14 |
| N Ostrobothnia51 F | N1c | 14 | 13 | 16 | 23 | 10 | 14 | 14 |
| N Savo29 F | N1c | 14 | 14 | 16 | 24 | 11 | 14 | 14 |
| N Savo30 F | N1c | 14 | 14 | 16 | 24 | 11 | 14 | 14 |
| N Savo31 F | N1c | 14 | 14 | 16 | 24 | 11 | 14 | 14 |
| N Savo32 F | N1c | 14 | 14 | 16 | 24 | 11 | 14 | 14 |
| N Savo33 F | N1c | 14 | 14 | 16 | 24 | 11 | 14 | 14 |
| N Savo34 F | N1c | 14 | 14 | 16 | 24 | 11 | 14 | 14 |
| N Savo35 F | N1c | 14 | 14 | 16 | 24 | 11 | 14 | 14 |
| N Savo36 F | N1c | 14 | 14 | 16 | 24 | 11 | 14 | 14 |
| N Savo37 F | N1c | 14 | 14 | 16 | 24 | 11 | 14 | 14 |
| N Savo38 F | N1c | 14 | 14 | 16 | 24 | 11 | 14 | 14 |
| N Savo39 F | N1c | 14 | 14 | 16 | 24 | 11 | 14 | 14 |
| N Ostrobothnia52 F | N1c | 14 | 14 | 16 | 24 | 11 | 14 | 14 |
| N Ostrobothnia53 F | N1c | 14 | 14 | 16 | 24 | 11 | 14 | 14 |
| N Ostrobothnia54 F | N1c | 14 | 14 | 16 | 24 | 11 | 14 | 14 |
| N Ostrobothnia55 F | N1c | 13 | 14 | 16 | 24 | 11 | 14 | 14 |
| N Ostrobothnia56 F | N1c | 14 | 14 | 16 | 23 | 11 | 14 | 15 |
| N Ostrobothnia57 F | N1c | 14 | 13 | 16 | 24 | 11 | 14 | 15 |
| N Savo40 F | N1c | 14 | 14 | 16 | 24 | 11 | 14 | 14 |
| N Ostrobothnia58 F | N1c | 14 | 14 | 16 | 24 | 11 | 14 | 14 |
| N Ostrobothnia59 F | N1c | 14 | 13 | 17 | 24 | 11 | 14 | 14 |
| N Ostrobothnia60 F | N1c | 14 | 13 | 16 | 23 | 10 | 14 | 15 |
| N Savo41 F | N1c | 14 | 14 | 16 | 23 | 10 | 14 | 14 |
| N Ostrobothnia61 F | N1c | 14 | 14 | 16 | 23 | 10 | 14 | 14 |
| N Ostrobothnia62 F | N1c | 14 | 13 | 16 | 23 | 10 | 14 | 14 |
| N Savo42 F | N1c | 14 | 13 | 16 | 24 | 11 | 14 | 15 |
| N Ostrobothnia63 F | N1c | 14 | 13 | 16 | 24 | 11 | 14 | 15 |
| N Ostrobothnia64 F | N1c | 14 | 13 | 16 | 24 | 11 | 14 | 15 |
| N Ostrobothnia65 F | N1c | 14 | 15 | 16 | 24 | 10 | 14 | 14 |
| N Ostrobothnia66 F | N1c | 14 | 14 | 16 | 25 | 11 | 14 | 14 |
| N Ostrobothnia67 F | N1c | 14 | 13 | 16 | 24 | 11 | 14 | 13 |
| N Ostrobothnia68 F | N1c | 13 | 14 | 16 | 23 | 11 | 14 | 14 |
| N Ostrobothnia69 F | N1c | 14 | 14 | 16 | 25 | 11 | 14 | 13 |
| N Ostrobothnia70 F | N1c | 14 | 14 | 16 | 25 | 11 | 15 | 14 |
| N Ostrobothnia71 F | N1c | 15 | 15 | 16 | 24 | 11 | 15 | 13 |
| N Ostrobothnia72 F | N1c | 14 | 13 | 16 | 23 | 10 | 14 | 14 |
| N Ostrobothnia73 F | N1c | 14 | 14 | 16 | 24 | 11 | 11 | 14 |
| N Ostrobothnia74 F | N1c | 14 | 14 | 16 | 24 | 11 | 11 | 14 |
| N Ostrobothnia75 F | N1c | 14 | 14 | 16 | 24 | 11 | 11 | 14 |
| N Ostrobothnia76 F | N1c | 14 | 15 | 16 | 24 | 11 | 14 | 14 |
| N Ostrobothnia77 F | N1c | 14 | 14 | 15 | 24 | 11 | 13 | 14 |
| N Ostrobothnia78 F | N1c | 14 | 13 | 16 | 24 | 11 | 13 | 15 |
| N Ostrobothnia79 F | N1c | 15 | 14 | 16 | 24 | 11 | 13 | 14 |
| N Ostrobothnia80 F | N1c | 14 | 14 | 17 | 24 | 11 | 13 | 14 |
| N Ostrobothnia81 F | N1c | 14 | 14 | 16 | 24 | 11 | 11 | 14 |
| N Ostrobothnia82 F | N1c | 14 | 14 | 16 | 23 | 10 | 11 | 14 |
| N Ostrobothnia83 F | N1c | 14 | 14 | 16 | 24 | 11 | 13 | 14 |
| N Ostrobothnia84 F | N1c | 15 | 13 | 16 | 24 | 11 | 14 | 15 |
| N Savo43 F | N1c | 14 | 14 | 16 | 22 | 11 | 14 | 14 |
| N Savo44 F | N1c | 15 | 14 | 15 | 25 | 12 | 14 | 14 |
| N Savo45 F | N1c | 14 | 14 | 16 | 24 | 12 | 14 | 14 |
| N Savo46 F | N1c | 14 | 14 | 16 | 24 | 11 | 14 | 14 |
| N Savo47 F | N1c | 14 | 14 | 16 | 24 | 11 | 14 | 14 |
| N Savo48 F | N1c | 14 | 14 | 16 | 24 | 11 | 14 | 14 |
| N Savo49 F | N1c | 14 | 14 | 16 | 24 | 12 | 14 | 14 |
| N Savo50 F | N1c | 14 | 14 | 16 | 24 | 12 | 14 | 14 |
| N Savo51 F | N1c | 14 | 13 | 16 | 24 | 11 | 14 | 13 |
| N Savo52 F | N1c | 14 | 13 | 16 | 23 | 12 | 14 | 14 |
| N Savo53 F | N1c | 14 | 14 | 16 | 22 | 12 | 14 | 14 |
| N Savo54 F | N1c | 14 | 14 | 16 | 25 | 11 | 14 | 14 |
| N Savo55 F | N1c | 14 | 14 | 16 | 25 | 11 | 14 | 14 |
| N Savo56 F | N1c | 14 | 13 | 16 | 24 | 12 | 14 | 15 |
| N Savo57 F | N1c | 14 | 14 | 16 | 24 | 12 | 14 | 14 |
| N Savo58 F | N1c | 14 | 14 | 16 | 24 | 12 | 14 | 14 |
| N Savo59 F | N1c | 15 | 14 | 16 | 24 | 10 | 14 | 14 |
| N Savo60 F | N1c | 15 | 13 | 16 | 23 | 11 | 14 | 14 |
| N Savo61 F | N1c | 14 | 15 | 16 | 24 | 11 | 14 | 14 |
| N Savo62 F | N1c | 14 | 14 | 16 | 24 | 11 | 15 | 14 |
| N Savo63 F | N1c | 14 | 14 | 16 | 24 | 10 | 14 | 14 |
| N Savo64 F | N1c | 14 | 14 | 16 | 24 | 10 | 14 | 14 |
| N Savo65 F | N1c | 15 | 14 | 17 | 25 | 11 | 14 | 14 |
| N Savo66 F | N1c | 14 | 14 | 16 | 23 | 10 | 14 | 14 |
| N Savo67 F | N1c | 15 | 14 | 17 | 24 | 10 | 14 | 14 |
| N Savo68 F | N1c | 16 | 14 | 17 | 24 | 10 | 14 | 14 |
| N Savo69 F | N1c | 13 | 14 | 17 | 23 | 11 | 14 | 14 |
| N Savo70 F | N1c | 14 | 14 | 16 | 24 | 11 | 14 | 14 |
| N Savo71 F | N1c | 14 | 14 | 15 | 24 | 11 | 14 | 14 |
| N Savo72 F | N1c | 14 | 14 | 16 | 25 | 11 | 14 | 14 |
| N Savo73 F | N1c | 15 | 15 | 16 | 24 | 11 | 14 | 14 |
| N Savo74 F | N1c | 15 | 13 | 16 | 23 | 11 | 14 | 13 |
| N Savo75 F | N1c | 13 | 14 | 16 | 24 | 10 | 14 | 14 |
| N Savo76 F | N1c | 14 | 14 | 16 | 24 | 11 | 14 | 14 |
| N Savo77 F | N1c | 14 | 14 | 16 | 24 | 10 | 14 | 14 |
| N Savo78 F | N1c | 14 | 14 | 16 | 24 | 10 | 14 | 14 |
| Satakunta07 F | N1c | 14 | 14 | 16 | 24 | 10 | 14 | 14 |
| N Savo79 F | N1c | 14 | 14 | 15 | 24 | 11 | 14 | 14 |
| N Savo80 F | N1c | 14 | 14 | 16 | 23 | 10 | 14 | 14 |
| SW Finland14 F | N1c | 14 | 14 | 16 | 23 | 10 | 14 | 14 |
| N Savo81 F | N1c | 14 | 13 | 17 | 23 | 11 | 14 | 13 |
| N Savo82 F | N1c | 13 | 14 | 16 | 24 | 11 | 14 | 14 |
| N Savo83 F | N1c | 14 | 14 | 16 | 23 | 11 | 14 | 14 |
| N Savo84 F | N1c | 14 | 14 | 17 | 24 | 11 | 14 | 14 |
| SS Ostrobothnia10 F | N1c | 13 | 13 | 16 | 23 | 10 | 14 | 14 |
| Satakunta08 F | N1c | 15 | 13 | 16 | 24 | 10 | 14 | 14 |
| Satakunta09 F | N1c | 15 | 14 | 16 | 24 | 10 | 14 | 14 |
| Satakunta10 F | N1c | 15 | 13 | 16 | 23 | 10 | 14 | 14 |
| Satakunta11 F | N1c | 15 | 13 | 16 | 23 | 10 | 14 | 14 |
| SW Finland15 F | N1c | 15 | 13 | 16 | 23 | 10 | 14 | 14 |
| Satakunta12 F | N1c | 15 | 13 | 16 | 24 | 10 | 14 | 14 |
| Satakunta13 F | N1c | 14 | 13 | 15 | 23 | 11 | 14 | 14 |
| SW Finland16 F | N1c | 14 | 13 | 16 | 23 | 11 | 15 | 14 |
| SW Finland17 F | N1c | 14 | 13 | 16 | 23 | 11 | 14 | 14 |
| SW Finland18 F | N1c | 14 | 13 | 16 | 24 | 10 | 14 | 14 |
| SW Finland19 F | N1c | 13 | 14 | 16 | 24 | 9 | 11 | 13 |
| SW Finland20 F | N1c | 15 | 14 | 16 | 23 | 10 | 14 | 14 |
| SW Finland21 F | N1c | 14 | 14 | 16 | 23 | 11 | 14 | 14 |
| SW Finland22 F | N1c | 14 | 14 | 16 | 23 | 11 | 14 | 14 |
| SW Finland23 F | N1c | 14 | 13 | 16 | 23 | 10 | 14 | 13 |
| SW Finland24 F | N1c | 15 | 13 | 16 | 24 | 10 | 14 | 13 |
| SW Finland25 F | N1c | 14 | 13 | 16 | 23 | 11 | 14 | 14 |
| SW Finland26 F | N1c | 14 | 13 | 16 | 23 | 11 | 14 | 14 |
| SW Finland27 F | N1c | 14 | 13 | 17 | 23 | 10 | 14 | 14 |
| SW Finland28 F | N1c | 15 | 13 | 16 | 23 | 10 | 14 | 15 |
| SW Finland29 F | N1c | 14 | 14 | 16 | 23 | 10 | 14 | 14 |
| Karelian01G | N1b | 13 | 13 | 18 | 23 | 10 | 12 | 12 |
| W Finnish01 G | N1b | 13 | 13 | 18 | 23 | 10 | 12 | 12 |
| W Finnish02 G | N1b | 15 | 13 | 18 | 23 | 10 | 12 | 12 |
| E Finnish01 G | N1c | 13 | 14 | 16 | 24 | 11 | 14 | 14 |
| W Finnish03 G | N1c | 13 | 13 | 16 | 23 | 10 | 14 | 14 |
| Karelian02 G | N1c | 13 | 14 | 16 | 23 | 10 | 11 | 14 |
| E Finnish02 G | N1c | 13 | 14 | 16 | 24 | 10 | 14 | 14 |
| E Finnish03 G | N1c | 13 | 14 | 16 | 24 | 11 | 14 | 14 |
| E Finnish04 G | N1c | 13 | 14 | 17 | 23 | 11 | 14 | 14 |
| Lithuanian01 G | N1c | 13 | 13 | 17 | 23 | 10 | 14 | 14 |
| W Finnish04 G | N1c | 13 | 14 | 16 | 23 | 11 | 14 | 14 |
| W Finnish05 G | N1c | 13 | 14 | 16 | 24 | 9 | 11 | 13 |
| E Finnish05 G | N1c | 14 | 14 | 16 | 24 | 11 | 14 | 14 |
| E Finnish06 G | N1c | 14 | 14 | 16 | 24 | 11 | 14 | 14 |
| W Finnish06 G | N1c | 14 | 13 | 16 | 23 | 11 | 14 | 14 |
| Swedish01 G | N1c | 14 | 13 | 16 | 23 | 11 | 14 | 14 |
| W Finnish07 G | N1c | 14 | 13 | 16 | 25 | 11 | 14 | 14 |
| Estonian01 G | N1c | 14 | 14 | 16 | 23 | 11 | 12 | 14 |
| E Finnish07 G | N1c | 14 | 14 | 16 | 24 | 12 | 14 | 14 |
| E Finnish08 G | N1c | 14 | 14 | 16 | 24 | 11 | 14 | 14 |
| W Finnish08 G | N1c | 14 | 13 | 16 | 23 | 11 | 14 | 14 |
| W Finnish09 G | N1c | 14 | 14 | 16 | 23 | 11 | 14 | 14 |
| E Finnish09 G | N1c | 14 | 13 | 16 | 24 | 11 | 14 | 15 |
| E Finnish10 G | N1c | 14 | 13 | 16 | 23 | 10 | 14 | 14 |
| Estonian02 G | N1c | 14 | 13 | 16 | 23 | 11 | 14 | 14 |
| Karelian03 G | N1c | 14 | 13 | 16 | 23 | 11 | 14 | 14 |
| Karelian04 G | N1c | 14 | 13 | 16 | 23 | 11 | 14 | 14 |
| W Finnish10 G | N1c | 14 | 13 | 16 | 23 | 11 | 14 | 14 |
| E Finnish11 G | N1c | 14 | 13 | 16 | 23 | 10 | 14 | 14 |
| Estonian03 G | N1c | 14 | 11 | 16 | 23 | 11 | 14 | 13 |
| Lithuanian02 G | N1c | 14 | 11 | 16 | 23 | 11 | 14 | 13 |
| W Finnish11 G | N1c | 14 | 12 | 16 | 24 | 11 | 14 | 14 |
| W Finnish12 G | N1c | 14 | 13 | 15 | 23 | 11 | 14 | 14 |
| Swedish02 G | N1c | 14 | 13 | 15 | 24 | 11 | 14 | 13 |
| Estonian04 G | N1c | 14 | 13 | 16 | 23 | 10 | 14 | 14 |
| Estonian05 G | N1c | 14 | 13 | 16 | 23 | 10 | 14 | 14 |
| Estonian06 G | N1c | 14 | 13 | 16 | 23 | 10 | 14 | 14 |
| Karelian05 G | N1c | 14 | 13 | 16 | 23 | 10 | 14 | 14 |
| W Finnish13 G | N1c | 14 | 13 | 16 | 23 | 10 | 14 | 14 |
| W Finnish14 G | N1c | 14 | 13 | 16 | 23 | 10 | 14 | 14 |
| W Finnish15 G | N1c | 14 | 13 | 16 | 23 | 10 | 14 | 14 |
| W Finnish16 G | N1c | 14 | 13 | 16 | 23 | 10 | 14 | 14 |
| W Finnish17 G | N1c | 14 | 13 | 16 | 23 | 10 | 14 | 14 |
| W Finnish18 G | N1c | 14 | 13 | 16 | 23 | 10 | 14 | 14 |
| W Finnish19 G | N1c | 14 | 13 | 16 | 23 | 10 | 14 | 14 |
| W Finnish20 G | N1c | 14 | 13 | 16 | 23 | 10 | 14 | 14 |
| W Finnish21 G | N1c | 14 | 13 | 16 | 23 | 10 | 14 | 14 |
| W Finnish22 G | N1c | 14 | 13 | 16 | 23 | 10 | 14 | 14 |
| Swedish03 G | N1c | 14 | 13 | 16 | 23 | 10 | 14 | 14 |
| Swedish04 G | N1c | 14 | 13 | 16 | 23 | 10 | 14 | 14 |
| Swedish05 G | N1c | 14 | 13 | 16 | 23 | 10 | 14 | 14 |
| Swedish06 G | N1c | 14 | 13 | 16 | 23 | 10 | 14 | 14 |
| Swedish07 G | N1c | 14 | 13 | 16 | 23 | 10 | 14 | 14 |
| E Finnish12 G | N1c | 14 | 13 | 16 | 23 | 10 | 14 | 15 |
| Estonian07 G | N1c | 14 | 13 | 16 | 23 | 11 | 14 | 13 |
| E Finnish13 G | N1c | 14 | 13 | 16 | 23 | 11 | 14 | 13 |
| W Finnish23 G | N1c | 14 | 13 | 16 | 23 | 11 | 14 | 13 |
| W Finnish24 G | N1c | 14 | 13 | 16 | 23 | 11 | 14 | 13 |
| W Finnish25 G | N1c | 14 | 13 | 16 | 23 | 11 | 14 | 13 |
| Estonian08 G | N1c | 14 | 13 | 16 | 23 | 11 | 14 | 14 |
| Karelian06 G | N1c | 14 | 13 | 16 | 23 | 11 | 14 | 14 |
| Karelian07 G | N1c | 14 | 13 | 16 | 23 | 11 | 14 | 14 |
| Karelian08 G | N1c | 14 | 13 | 16 | 23 | 11 | 14 | 14 |
| E Finnish14 | N1c | 14 | 13 | 16 | 23 | 11 | 14 | 14 |
| E Finnish15 G | N1c | 14 | 13 | 16 | 23 | 11 | 14 | 14 |
| E Finnish16 G | N1c | 14 | 13 | 16 | 23 | 11 | 14 | 14 |
| E Finnish17 G | N1c | 14 | 13 | 16 | 23 | 11 | 14 | 14 |
| E Finnish18 G | N1c | 14 | 13 | 16 | 23 | 11 | 14 | 14 |
| W Finnish26 G | N1c | 14 | 13 | 16 | 23 | 11 | 14 | 14 |
| W Finnish27 G | N1c | 14 | 13 | 16 | 23 | 11 | 14 | 14 |
| W Finnish28 G | N1c | 14 | 13 | 16 | 23 | 11 | 14 | 14 |
| W Finnish29 G | N1c | 14 | 13 | 16 | 23 | 11 | 14 | 14 |
| W Finnish30 G | N1c | 14 | 13 | 16 | 23 | 11 | 14 | 14 |
| W Finnish31 G | N1c | 14 | 13 | 16 | 23 | 11 | 14 | 14 |
| W Finnish32 G | N1c | 14 | 13 | 16 | 23 | 11 | 14 | 14 |
| Estonian09 G | N1c | 14 | 13 | 16 | 23 | 11 | 15 | 14 |
| W Finnish33 G | N1c | 14 | 13 | 16 | 23 | 11 | 15 | 14 |
| E Finnish19 G | N1c | 14 | 13 | 16 | 23 | 12 | 14 | 13 |
| E Finnish20 G | N1c | 14 | 13 | 16 | 23 | 12 | 14 | 14 |
| W Finnish34 G | N1c | 14 | 13 | 16 | 24 | 10 | 14 | 14 |
| E Finnish21 G | N1c | 14 | 13 | 16 | 24 | 11 | 13 | 15 |
| E Finnish22 G | N1c | 14 | 13 | 16 | 24 | 11 | 14 | 13 |
| Karelian09 G | N1c | 14 | 13 | 16 | 24 | 11 | 14 | 14 |
| Karelian10 G | N1c | 14 | 13 | 16 | 24 | 11 | 14 | 14 |
| E Finnish23 G | N1c | 14 | 13 | 16 | 24 | 11 | 14 | 14 |
| E Finnish24 G | N1c | 14 | 13 | 16 | 24 | 11 | 14 | 14 |
| E Finnish25 G | N1c | 14 | 13 | 16 | 24 | 11 | 14 | 14 |
| E Finnish26 G | N1c | 14 | 13 | 16 | 24 | 11 | 14 | 14 |
| E Finnish27 G | N1c | 14 | 13 | 16 | 24 | 11 | 14 | 14 |
| W Finnish35 G | N1c | 14 | 13 | 16 | 24 | 11 | 14 | 14 |
| W Finnish36 G | N1c | 14 | 13 | 16 | 24 | 11 | 14 | 14 |
| Swedish08 G | N1c | 14 | 13 | 16 | 24 | 11 | 14 | 14 |
| Estonian10 G | N1c | 14 | 13 | 16 | 24 | 11 | 14 | 15 |
| E Finnish28 G | N1c | 14 | 13 | 16 | 24 | 11 | 14 | 15 |
| W Finnish37 G | N1c | 14 | 13 | 16 | 24 | 11 | 14 | 15 |
| Swedish09 G | N1c | 14 | 13 | 16 | 24 | 11 | 14 | 15 |
| Estonian11 G | N1c | 14 | 13 | 16 | 24 | 13 | 14 | 14 |
| E Finnish29 G | N1c | 14 | 13 | 16 | 25 | 11 | 14 | 14 |
| W Finnish38 G | N1c | 14 | 13 | 16 | 25 | 11 | 14 | 14 |
| W Finnish39 G | N1c | 14 | 13 | 17 | 23 | 10 | 14 | 14 |
| E Finnish30 G | N1c | 14 | 13 | 17 | 23 | 11 | 14 | 13 |
| Karelian11 G | N1c | 14 | 13 | 17 | 23 | 11 | 14 | 14 |
| W Finnish40 G | N1c | 14 | 13 | 17 | 23 | 11 | 14 | 14 |
| W Finnish41 G | N1c | 14 | 13 | 17 | 24 | 10 | 14 | 14 |
| Karelian12 G | N1c | 14 | 13 | 17 | 24 | 11 | 14 | 14 |
| E Finnish31 G | N1c | 14 | 13 | 17 | 24 | 11 | 14 | 14 |
| E Finnish32 G | N1c | 14 | 13 | 18 | 24 | 12 | 14 | 14 |
| Karelian13 G | N1c | 14 | 14 | 15 | 23 | 10 | 14 | 14 |
| Karelian14 G | N1c | 14 | 14 | 15 | 23 | 11 | 14 | 14 |
| Karelian15 G | N1c | 14 | 14 | 15 | 23 | 11 | 14 | 14 |
| Karelian16 G | N1c | 14 | 14 | 15 | 23 | 12 | 14 | 14 |
| E Finnish33 G | N1c | 14 | 14 | 15 | 24 | 11 | 13 | 14 |
| E Finnish34 G | N1c | 14 | 14 | 15 | 24 | 11 | 14 | 14 |
| E Finnish35 G | N1c | 14 | 14 | 16 | 23 | 10 | 11 | 14 |
| Karelian17 G | N1c | 14 | 14 | 16 | 23 | 10 | 14 | 14 |
| Karelian18 G | N1c | 14 | 14 | 16 | 23 | 10 | 14 | 14 |
| Karelian19 G | N1c | 14 | 14 | 16 | 23 | 10 | 14 | 14 |
| E Finnish36 G | N1c | 14 | 14 | 16 | 23 | 10 | 14 | 14 |
| Estonian12 G | N1c | 14 | 14 | 16 | 23 | 11 | 14 | 13 |
| Estonian13 G | N1c | 14 | 14 | 16 | 23 | 11 | 14 | 14 |
| Estonian14 G | N1c | 14 | 14 | 16 | 23 | 11 | 14 | 14 |
| Lithuanian03 G | N1c | 14 | 14 | 16 | 23 | 11 | 14 | 14 |
| Karelian20 G | N1c | 14 | 14 | 16 | 23 | 11 | 14 | 14 |
| Karelian21 G | N1c | 14 | 14 | 16 | 23 | 11 | 14 | 14 |
| Karelian22 G | N1c | 14 | 14 | 16 | 23 | 11 | 14 | 14 |
| Karelian23 G | N1c | 14 | 14 | 16 | 23 | 11 | 14 | 14 |
| Karelian24 G | N1c | 14 | 14 | 16 | 23 | 11 | 14 | 14 |
| Karelian25 G | N1c | 14 | 14 | 16 | 23 | 11 | 14 | 14 |
| Karelian26 G | N1c | 14 | 14 | 16 | 23 | 11 | 14 | 14 |
| E Finnish37 G | N1c | 14 | 14 | 16 | 23 | 11 | 14 | 14 |
| E Finnish38 G | N1c | 14 | 14 | 16 | 23 | 11 | 14 | 14 |
| E Finnish39 G | N1c | 14 | 14 | 16 | 23 | 11 | 14 | 14 |
| E Finnish40 G | N1c | 14 | 14 | 16 | 23 | 11 | 14 | 14 |
| E Finnish41 G | N1c | 14 | 14 | 16 | 23 | 11 | 14 | 14 |
| W Finnish42 G | N1c | 14 | 14 | 16 | 23 | 11 | 14 | 14 |
| W Finnish43 G | N1c | 14 | 14 | 16 | 23 | 11 | 14 | 14 |
| W Finnish44 G | N1c | 14 | 14 | 16 | 23 | 11 | 14 | 14 |
| W Finnish45 G | N1c | 14 | 14 | 16 | 23 | 11 | 14 | 14 |
| W Finnish46 G | N1c | 14 | 14 | 16 | 23 | 11 | 14 | 14 |
| W Finnish47 G | N1c | 14 | 14 | 16 | 23 | 11 | 14 | 14 |
| W Finnish48 G | N1c | 14 | 14 | 16 | 23 | 11 | 14 | 14 |
| Karelian27 G | N1c | 14 | 14 | 16 | 23 | 11 | 15 | 13 |
| Estonian15 G | N1c | 14 | 14 | 16 | 23 | 11 | 15 | 14 |
| Karelian28 G | N1c | 14 | 14 | 16 | 23 | 12 | 14 | 14 |
| Estonian16 G | N1c | 14 | 14 | 16 | 24 | 10 | 14 | 13 |
| Estonian17 G | N1c | 14 | 14 | 16 | 24 | 10 | 14 | 14 |
| Karelian28 G | N1c | 14 | 14 | 16 | 24 | 10 | 14 | 14 |
| Karelian29 G | N1c | 14 | 14 | 16 | 24 | 10 | 14 | 14 |
| Karelian30 G | N1c | 14 | 14 | 16 | 24 | 10 | 14 | 14 |
| E Finnish42 G | N1c | 14 | 14 | 16 | 24 | 10 | 14 | 14 |
| E Finnish43 G | N1c | 14 | 14 | 16 | 24 | 10 | 14 | 14 |
| E Finnish44 G | N1c | 14 | 14 | 16 | 24 | 10 | 14 | 14 |
| E Finnish45 G | N1c | 14 | 14 | 16 | 24 | 10 | 14 | 14 |
| E Finnish46 G | N1c | 14 | 14 | 16 | 24 | 10 | 14 | 14 |
| W Finnish49 G | N1c | 14 | 14 | 16 | 24 | 10 | 14 | 14 |
| W Finnish50 G | N1c | 14 | 14 | 16 | 24 | 10 | 14 | 14 |
| W Finnish51 G | N1c | 14 | 14 | 16 | 24 | 10 | 14 | 14 |
| W Finnish52 G | N1c | 14 | 14 | 16 | 24 | 10 | 14 | 14 |
| W Finnish53 G | N1c | 14 | 14 | 16 | 24 | 10 | 14 | 14 |
| W Finnish54 G | N1c | 14 | 14 | 16 | 24 | 10 | 14 | 14 |
| E Finnish47 G | N1c | 14 | 14 | 16 | 24 | 10 | 14 | 15 |
| E Finnish48 G | N1c | 14 | 14 | 16 | 24 | 11 | 11 | 14 |
| E Finnish49 G | N1c | 14 | 14 | 16 | 24 | 11 | 11 | 14 |
| E Finnish50 G | N1c | 14 | 14 | 16 | 24 | 11 | 11 | 14 |
| E Finnish51 G | N1c | 14 | 14 | 16 | 24 | 11 | 13 | 14 |
| E Finnish52 G | N1c | 14 | 14 | 16 | 24 | 11 | 14 | 12 |
| Swedish10 G | N1c | 14 | 14 | 16 | 24 | 11 | 14 | 12 |
| E Finnish53 G | N1c | 14 | 14 | 16 | 24 | 11 | 14 | 13 |
| E Finnish54 G | N1c | 14 | 14 | 16 | 24 | 11 | 14 | 13 |
| E Finnish55 G | N1c | 14 | 14 | 16 | 24 | 11 | 14 | 13 |
| Estonian18 G | N1c | 14 | 14 | 16 | 24 | 11 | 14 | 14 |
| Estonian19 G | N1c | 14 | 14 | 16 | 24 | 11 | 14 | 14 |
| Karelian31 G | N1c | 14 | 14 | 16 | 24 | 11 | 14 | 14 |
| Karelian32 G | N1c | 14 | 14 | 16 | 24 | 11 | 14 | 14 |
| Karelian33 G | N1c | 14 | 14 | 16 | 24 | 11 | 14 | 14 |
| Karelian34 G | N1c | 14 | 14 | 16 | 24 | 11 | 14 | 14 |
| Karelian35 G | N1c | 14 | 14 | 16 | 24 | 11 | 14 | 14 |
| Karelian36 G | N1c | 14 | 14 | 16 | 24 | 11 | 14 | 14 |
| Karelian37 G | N1c | 14 | 14 | 16 | 24 | 11 | 14 | 14 |
| Karelian38 G | N1c | 14 | 14 | 16 | 24 | 11 | 14 | 14 |
| Karelian39 G | N1c | 14 | 14 | 16 | 24 | 11 | 14 | 14 |
| Karelian40 G | N1c | 14 | 14 | 16 | 24 | 11 | 14 | 14 |
| Karelian41 G | N1c | 14 | 14 | 16 | 24 | 11 | 14 | 14 |
| Karelian42 G | N1c | 14 | 14 | 16 | 24 | 11 | 14 | 14 |
| Karelian43 G | N1c | 14 | 14 | 16 | 24 | 11 | 14 | 14 |
| Karelian44 G | N1c | 14 | 14 | 16 | 24 | 11 | 14 | 14 |
| Karelian45 G | N1c | 14 | 14 | 16 | 24 | 11 | 14 | 14 |
| Karelian46 G | N1c | 14 | 14 | 16 | 24 | 11 | 14 | 14 |
| Karelian47 G | N1c | 14 | 14 | 16 | 24 | 11 | 14 | 14 |
| Karelian48 G | N1c | 14 | 14 | 16 | 24 | 11 | 14 | 14 |
| Karelian49 G | N1c | 14 | 14 | 16 | 24 | 11 | 14 | 14 |
| Karelian50 G | N1c | 14 | 14 | 16 | 24 | 11 | 14 | 14 |
| Karelian51 G | N1c | 14 | 14 | 16 | 24 | 11 | 14 | 14 |
| E Finnish56 G | N1c | 14 | 14 | 16 | 24 | 11 | 14 | 14 |
| E Finnish57 G | N1c | 14 | 14 | 16 | 24 | 11 | 14 | 14 |
| E Finnish58 G | N1c | 14 | 14 | 16 | 24 | 11 | 14 | 14 |
| E Finnish59 G | N1c | 14 | 14 | 16 | 24 | 11 | 14 | 14 |
| E Finnish60 G | N1c | 14 | 14 | 16 | 24 | 11 | 14 | 14 |
| E Finnish61 G | N1c | 14 | 14 | 16 | 24 | 11 | 14 | 14 |
| E Finnish62 G | N1c | 14 | 14 | 16 | 24 | 11 | 14 | 14 |
| E Finnish63 G | N1c | 14 | 14 | 16 | 24 | 11 | 14 | 14 |
| E Finnish64 G | N1c | 14 | 14 | 16 | 24 | 11 | 14 | 14 |
| E Finnish65 G | N1c | 14 | 14 | 16 | 24 | 11 | 14 | 14 |
| E Finnish66 G | N1c | 14 | 14 | 16 | 24 | 11 | 14 | 14 |
| E Finnish67 G | N1c | 14 | 14 | 16 | 24 | 11 | 14 | 14 |
| E Finnish68 G | N1c | 14 | 14 | 16 | 24 | 11 | 14 | 14 |
| E Finnish69 G | N1c | 14 | 14 | 16 | 24 | 11 | 14 | 14 |
| E Finnish70 G | N1c | 14 | 14 | 16 | 24 | 11 | 14 | 14 |
| E Finnish71 G | N1c | 14 | 14 | 16 | 24 | 11 | 14 | 14 |
| E Finnish72 G | N1c | 14 | 14 | 16 | 24 | 11 | 14 | 14 |
| E Finnish73 G | N1c | 14 | 14 | 16 | 24 | 11 | 14 | 14 |
| E Finnish74 G | N1c | 14 | 14 | 16 | 24 | 11 | 14 | 14 |
| E Finnish75 G | N1c | 14 | 14 | 16 | 24 | 11 | 14 | 14 |
| E Finnish76 G | N1c | 14 | 14 | 16 | 24 | 11 | 14 | 14 |
| E Finnish77 G | N1c | 14 | 14 | 16 | 24 | 11 | 14 | 14 |
| E Finnish78 G | N1c | 14 | 14 | 16 | 24 | 11 | 14 | 14 |
| E Finnish79 G | N1c | 14 | 14 | 16 | 24 | 11 | 14 | 14 |
| E Finnish80 G | N1c | 14 | 14 | 16 | 24 | 11 | 14 | 14 |
| E Finnish81 G | N1c | 14 | 14 | 16 | 24 | 11 | 14 | 14 |
| E Finnish82 G | N1c | 14 | 14 | 16 | 24 | 11 | 14 | 14 |
| E Finnish83 G | N1c | 14 | 14 | 16 | 24 | 11 | 14 | 14 |
| E Finnish84 G | N1c | 14 | 14 | 16 | 24 | 11 | 14 | 14 |
| E Finnish85 G | N1c | 14 | 14 | 16 | 24 | 11 | 14 | 14 |
| E Finnish86 G | N1c | 14 | 14 | 16 | 24 | 11 | 14 | 14 |
| E Finnish87 G | N1c | 14 | 14 | 16 | 24 | 11 | 14 | 14 |
| E Finnish88 G | N1c | 14 | 14 | 16 | 24 | 11 | 14 | 14 |
| E Finnish89 G | N1c | 14 | 14 | 16 | 24 | 11 | 14 | 14 |
| E Finnish90 G | N1c | 14 | 14 | 16 | 24 | 11 | 14 | 14 |
| E Finnish91 G | N1c | 14 | 14 | 16 | 24 | 11 | 14 | 14 |
| E Finnish92 G | N1c | 14 | 14 | 16 | 24 | 11 | 14 | 14 |
| E Finnish93 G | N1c | 14 | 14 | 16 | 24 | 11 | 14 | 14 |
| E Finnish94 G | N1c | 14 | 14 | 16 | 24 | 11 | 14 | 14 |
| E Finnish95 G | N1c | 14 | 14 | 16 | 24 | 11 | 14 | 14 |
| E Finnish96 G | N1c | 14 | 14 | 16 | 24 | 11 | 14 | 14 |
| E Finnish97 G | N1c | 14 | 14 | 16 | 24 | 11 | 14 | 14 |
| E Finnish98 G | N1c | 14 | 14 | 16 | 24 | 11 | 14 | 14 |
| E Finnish99 G | N1c | 14 | 14 | 16 | 24 | 11 | 14 | 14 |
| E Finnish100 G | N1c | 14 | 14 | 16 | 24 | 11 | 14 | 14 |
| E Finnish101 G | N1c | 14 | 14 | 16 | 24 | 11 | 14 | 14 |
| E Finnish102 G | N1c | 14 | 14 | 16 | 24 | 11 | 14 | 14 |
| E Finnish103 G | N1c | 14 | 14 | 16 | 24 | 11 | 14 | 14 |
| E Finnish104 G | N1c | 14 | 14 | 16 | 24 | 11 | 14 | 14 |
| E Finnish105 G | N1c | 14 | 14 | 16 | 24 | 11 | 14 | 14 |
| E Finnish106 G | N1c | 14 | 14 | 16 | 24 | 11 | 14 | 14 |
| E Finnish107 G | N1c | 14 | 14 | 16 | 24 | 11 | 14 | 14 |
| E Finnish108 G | N1c | 14 | 14 | 16 | 24 | 11 | 14 | 14 |
| W Finnish55 G | N1c | 14 | 14 | 16 | 24 | 11 | 14 | 14 |
| W Finnish56 G | N1c | 14 | 14 | 16 | 24 | 11 | 14 | 14 |
| W Finnish57 G | N1c | 14 | 14 | 16 | 24 | 11 | 14 | 14 |
| W Finnish58 G | N1c | 14 | 14 | 16 | 24 | 11 | 14 | 14 |
| W Finnish59 G | N1c | 14 | 14 | 16 | 24 | 11 | 14 | 14 |
| W Finnish60 G | N1c | 14 | 14 | 16 | 24 | 11 | 14 | 14 |
| W Finnish61 G | N1c | 14 | 14 | 16 | 24 | 11 | 14 | 14 |
| W Finnish62 G | N1c | 14 | 14 | 16 | 24 | 11 | 14 | 14 |
| W Finnish63 G | N1c | 14 | 14 | 16 | 24 | 11 | 14 | 14 |
| W Finnish64 G | N1c | 14 | 14 | 16 | 24 | 11 | 14 | 14 |
| W Finnish65 G | N1c | 14 | 14 | 16 | 24 | 11 | 14 | 14 |
| W Finnish66 G | N1c | 14 | 14 | 16 | 24 | 11 | 14 | 14 |
| Swedish11 G | N1c | 14 | 14 | 16 | 24 | 11 | 14 | 14 |
| Swedish12 G | N1c | 14 | 14 | 16 | 24 | 11 | 14 | 14 |
| Swedish13 G | N1c | 14 | 14 | 16 | 24 | 11 | 14 | 14 |
| Swedish14 G | N1c | 14 | 14 | 16 | 24 | 11 | 14 | 14 |
| Swedish15 G | N1c | 14 | 14 | 16 | 24 | 11 | 14 | 14 |
| Estonian20 G | N1c | 14 | 14 | 16 | 24 | 11 | 14 | 15 |
| E Finnish109 G | N1c | 14 | 14 | 16 | 24 | 11 | 14 | 15 |
| E Finnish110 G | N1c | 14 | 14 | 16 | 24 | 11 | 14 | 15 |
| E Finnish111 G | N1c | 14 | 14 | 16 | 24 | 11 | 14 | 15 |
| E Finnish112 G | N1c | 14 | 14 | 16 | 24 | 11 | 15 | 14 |
| E Finnish113 G | N1c | 14 | 14 | 16 | 24 | 11 | 15 | 14 |
| W Finnish67 G | N1c | 14 | 14 | 16 | 24 | 11 | 15 | 14 |
| Estonian21 G | N1c | 14 | 14 | 16 | 24 | 12 | 14 | 14 |
| E Finnish114 G | N1c | 14 | 14 | 16 | 24 | 12 | 14 | 14 |
| E Finnish115 G | N1c | 14 | 14 | 16 | 24 | 12 | 14 | 14 |
| E Finnish116 G | N1c | 14 | 14 | 16 | 24 | 12 | 14 | 14 |
| E Finnish117 G | N1c | 14 | 14 | 16 | 24 | 12 | 14 | 14 |
| E Finnish118 G | N1c | 14 | 14 | 16 | 24 | 12 | 14 | 14 |
| E Finnish119 G | N1c | 14 | 14 | 16 | 24 | 12 | 14 | 14 |
| E Finnish120 G | N1c | 14 | 14 | 16 | 24 | 12 | 14 | 14 |
| E Finnish121 G | N1c | 14 | 14 | 16 | 24 | 12 | 14 | 14 |
| E Finnish122 G | N1c | 14 | 14 | 16 | 24 | 12 | 14 | 14 |
| E Finnish123 G | N1c | 14 | 14 | 16 | 24 | 12 | 14 | 14 |
| E Finnish124 G | N1c | 14 | 14 | 16 | 24 | 12 | 14 | 14 |
| E Finnish125 G | N1c | 14 | 14 | 16 | 24 | 12 | 14 | 14 |
| W Finnish68 G | N1c | 14 | 14 | 16 | 24 | 12 | 14 | 14 |
| W Finnish69 G | N1c | 14 | 14 | 16 | 24 | 12 | 14 | 14 |
| Swedish16 G | N1c | 14 | 14 | 16 | 25 | 10 | 14 | 14 |
| Swedish17 G | N1c | 14 | 14 | 16 | 25 | 10 | 14 | 14 |
| E Finnish126 G | N1c | 14 | 14 | 16 | 25 | 11 | 14 | 13 |
| Karelian52 G | N1c | 14 | 14 | 16 | 25 | 11 | 14 | 14 |
| E Finnish127 G | N1c | 14 | 14 | 16 | 25 | 11 | 14 | 14 |
| E Finnish128 G | N1c | 14 | 14 | 16 | 25 | 11 | 15 | 14 |
| E Finnish129 G | N1c | 14 | 14 | 16 | 25 | 12 | 14 | 15 |
| Latvian01 G | N1c | 14 | 14 | 17 | 23 | 10 | 14 | 14 |
| Estonian22 G | N1c | 14 | 14 | 17 | 23 | 11 | 13 | 13 |
| Karelian53 G | N1c | 14 | 14 | 17 | 23 | 11 | 14 | 14 |
| E Finnish130 G | N1c | 14 | 14 | 17 | 23 | 11 | 14 | 14 |
| W Finnish70 G | N1c | 14 | 14 | 17 | 23 | 11 | 14 | 14 |
| E Finnish131 G | N1c | 14 | 14 | 17 | 23 | 12 | 14 | 15 |
| Karelian54 G | N1c | 14 | 14 | 17 | 24 | 10 | 14 | 14 |
| Karelian55 G | N1c | 14 | 14 | 17 | 24 | 10 | 14 | 14 |
| Estonian23 G | N1c | 14 | 14 | 17 | 24 | 10 | 15 | 15 |
| E Finnish132 G | N1c | 14 | 14 | 17 | 24 | 11 | 13 | 14 |
| Estonian24 G | N1c | 14 | 14 | 17 | 24 | 11 | 14 | 13 |
| E Finnish133 G | N1c | 14 | 14 | 17 | 24 | 11 | 14 | 13 |
| Karelian56 G | N1c | 14 | 14 | 17 | 24 | 11 | 14 | 14 |
| E Finnish134 G | N1c | 14 | 14 | 17 | 24 | 11 | 14 | 14 |
| E Finnish135 G | N1c | 14 | 14 | 17 | 24 | 11 | 14 | 14 |
| E Finnish136 G | N1c | 14 | 14 | 17 | 24 | 11 | 14 | 14 |
| E Finnish137 G | N1c | 14 | 14 | 17 | 24 | 11 | 14 | 14 |
| E Finnish138 G | N1c | 14 | 14 | 17 | 24 | 11 | 14 | 14 |
| W Finnish71 G | N1c | 14 | 14 | 17 | 24 | 11 | 14 | 14 |
| E Finnish139 G | N1c | 14 | 14 | 17 | 24 | 12 | 14 | 14 |
| Latvian02 G | N1c | 14 | 14 | 18 | 23 | 11 | 13 | 14 |
| Karelian57 G | N1c | 14 | 14 | 18 | 23 | 11 | 14 | 14 |
| Estonian25 G | N1c | 14 | 15 | 16 | 23 | 11 | 14 | 14 |
| E Finnish140 G | N1c | 14 | 15 | 16 | 24 | 10 | 14 | 14 |
| Karelian58 G | N1c | 14 | 15 | 16 | 24 | 11 | 14 | 14 |
| E Finnish141 G | N1c | 14 | 15 | 16 | 24 | 11 | 14 | 14 |
| W Finnish72 G | N1c | 14 | 15 | 16 | 25 | 12 | 14 | 14 |
| Estonian26 G | N1c | 14 | 15 | 17 | 24 | 11 | 14 | 14 |
| E Finnish142 G | N1c | 14 | 13 | 16 | 24 | 11 | 14 | 15 |
| E Finnish143 G | N1c | 14 | 13 | 16 | 24 | 11 | 14 | 15 |
| Estonian27 G | N1c | 14 | 13 | 16 | 24 | 11 | 15 | 13 |
| E Finnish144 G | N1c | 14 | 13 | 16 | 25 | 10 | 14 | 14 |
| E Finnish145 G | N1c | 14 | 14 | 15 | 24 | 11 | 14 | 14 |
| E Finnish146 G | N1c | 14 | 14 | 16 | 23 | 10 | 14 | 14 |
| W Finnish72 G | N1c | 14 | 14 | 16 | 23 | 10 | 14 | 14 |
| E Finnish147 G | N1c | 14 | 14 | 16 | 24 | 10 | 14 | 14 |
| E Finnish148 G | N1c | 14 | 14 | 16 | 24 | 10 | 14 | 14 |
| W Finnish73 G | N1c | 14 | 14 | 16 | 24 | 10 | 14 | 14 |
| Karelian59 G | N1c | 14 | 14 | 16 | 24 | 11 | 14 | 14 |
| E Finnish149 G | N1c | 14 | 14 | 16 | 24 | 11 | 14 | 14 |
| E Finnish150 G | N1c | 14 | 14 | 16 | 24 | 11 | 14 | 14 |
| E Finnish151 G | N1c | 14 | 14 | 16 | 24 | 11 | 14 | 14 |
| E Finnish152 G | N1c | 14 | 14 | 16 | 24 | 12 | 14 | 14 |
| E Finnish153 G | N1c | 14 | 14 | 16 | 24 | 12 | 14 | 14 |
| E Finnish154 G | N1c | 14 | 14 | 16 | 25 | 11 | 14 | 14 |
| E Finnish155 G | N1c | 14 | 13 | 16 | 23 | 12 | 14 | 14 |
| E Finnish156 G | N1c | 14 | 13 | 16 | 24 | 11 | 14 | 13 |
| E Finnish157 G | N1c | 14 | 13 | 16 | 24 | 11 | 14 | 15 |
| E Finnish158 G | N1c | 14 | 14 | 16 | 22 | 12 | 14 | 14 |
| E Finnish159 G | N1c | 14 | 14 | 16 | 23 | 10 | 14 | 14 |
| E Finnish160 G | N1c | 14 | 14 | 16 | 23 | 10 | 14 | 14 |
| E Finnish161 G | N1c | 14 | 14 | 16 | 24 | 10 | 14 | 14 |
| E Finnish162 G | N1c | 14 | 14 | 16 | 24 | 10 | 14 | 14 |
| E Finnish163 G | N1c | 14 | 14 | 16 | 24 | 11 | 14 | 14 |
| E Finnish164 G | N1c | 14 | 14 | 16 | 24 | 11 | 14 | 14 |
| E Finnish165 G | N1c | 14 | 14 | 16 | 24 | 11 | 14 | 14 |
| E Finnish166 G | N1c | 14 | 14 | 16 | 24 | 11 | 14 | 14 |
| E Finnish167 G | N1c | 14 | 14 | 16 | 24 | 11 | 14 | 14 |
| E Finnish168 G | N1c | 14 | 14 | 16 | 24 | 11 | 14 | 14 |
| E Finnish169 G | N1c | 14 | 14 | 16 | 24 | 11 | 14 | 14 |
| E Finnish170 G | N1c | 14 | 14 | 16 | 24 | 11 | 14 | 14 |
| E Finnish171 G | N1c | 14 | 14 | 16 | 24 | 11 | 14 | 14 |
| E Finnish172 G | N1c | 14 | 14 | 16 | 24 | 11 | 14 | 14 |
| E Finnish173 G | N1c | 14 | 14 | 16 | 24 | 11 | 14 | 14 |
| E Finnish174 G | N1c | 14 | 14 | 16 | 24 | 11 | 14 | 14 |
| E Finnish175 G | N1c | 14 | 14 | 16 | 24 | 11 | 14 | 14 |
| E Finnish176 G | N1c | 14 | 14 | 16 | 24 | 11 | 14 | 14 |
| E Finnish177 G | N1c | 14 | 14 | 16 | 24 | 11 | 15 | 14 |
| E Finnish178 G | N1c | 14 | 14 | 16 | 24 | 12 | 14 | 14 |
| E Finnish179 G | N1c | 14 | 14 | 16 | 24 | 12 | 14 | 14 |
| E Finnish180 G | N1c | 14 | 14 | 16 | 25 | 11 | 14 | 14 |
| E Finnish181 G | N1c | 14 | 14 | 16 | 25 | 11 | 14 | 14 |
| E Finnish182 G | N1c | 14 | 15 | 16 | 24 | 11 | 14 | 14 |
| E Finnish183 G | N1c | 14 | 13 | 16 | 24 | 12 | 14 | 15 |
| E Finnish184 G | N1c | 14 | 14 | 16 | 24 | 12 | 14 | 14 |
| Estonian28 G | N1c | 14 | 13 | 15 | 23 | 11 | 14 | 15 |
| W Finnish74 G | N1c | 14 | 13 | 16 | 23 | 10 | 14 | 13 |
| Swedish18 G | N1c | 14 | 13 | 16 | 23 | 10 | 14 | 14 |
| Latvian03 G | N1c | 14 | 13 | 16 | 23 | 11 | 14 | 13 |
| Latvian04 G | N1c | 14 | 13 | 16 | 23 | 11 | 14 | 14 |
| Karelian60 G | N1c | 14 | 13 | 16 | 23 | 11 | 14 | 14 |
| W Finnish75 G | N1c | 14 | 13 | 16 | 23 | 11 | 14 | 14 |
| E Finnish185 G | N1c | 14 | 13 | 17 | 24 | 11 | 14 | 13 |
| Karelian61 G | N1c | 14 | 14 | 15 | 24 | 11 | 14 | 14 |
| E Finnish186 G | N1c | 14 | 14 | 16 | 22 | 11 | 14 | 14 |
| Karelian62 G | N1c | 14 | 14 | 16 | 23 | 10 | 14 | 13 |
| Karelian63 G | N1c | 14 | 14 | 16 | 23 | 11 | 14 | 14 |
| E Finnish187 G | N1c | 14 | 14 | 16 | 23 | 11 | 14 | 14 |
| E Finnish188 G | N1c | 14 | 14 | 16 | 24 | 11 | 11 | 14 |
| E Finnish189 G | N1c | 14 | 14 | 16 | 24 | 11 | 14 | 13 |
| E Finnish190 G | N1c | 14 | 14 | 16 | 24 | 11 | 14 | 14 |
| E Finnish191 G | N1c | 14 | 14 | 16 | 24 | 11 | 14 | 14 |
| W Finnish76 G | N1c | 14 | 14 | 16 | 24 | 11 | 14 | 14 |
| W Finnish77 G | N1c | 14 | 14 | 16 | 24 | 11 | 14 | 14 |
| Swedish19 G | N1c | 14 | 14 | 16 | 24 | 11 | 14 | 15 |
| W Finnish78 G | N1c | 14 | 14 | 16 | 24 | 12 | 14 | 14 |
| W Finnish79 G | N1c | 14 | 14 | 16 | 24 | 12 | 14 | 14 |
| Karelian64 G | N1c | 14 | 14 | 17 | 23 | 10 | 14 | 14 |
| Estonian29 G | N1c | 14 | 14 | 17 | 24 | 10 | 14 | 13 |
| E Finnish192 G | N1c | 14 | 15 | 16 | 24 | 11 | 14 | 13 |
| E Finnish193 G | N1c | 14 | 15 | 16 | 24 | 11 | 14 | 14 |
| W Finnish80 G | N1c | 14 | 15 | 16 | 24 | 11 | 14 | 14 |
| E Finnish194 G | N1c | 14 | 14 | 16 | 23 | 11 | 14 | 15 |
| E Finnish195 G | N1c | 14 | 13 | 16 | 23 | 10 | 14 | 14 |
| Karelian65 G | N1c | 14 | 13 | 16 | 24 | 11 | 14 | 14 |
| W Finnish81 G | N1c | 14 | 14 | 16 | 23 | 11 | 14 | 14 |
| E Finnish196 G | N1c | 14 | 14 | 16 | 24 | 12 | 14 | 14 |
| Swedish20 G | N1c | 14 | 14 | 16 | 25 | 10 | 14 | 14 |
| W Finnish82 G | N1c | 14 | 14 | 17 | 24 | 11 | 14 | 14 |
| W Finnish83 G | N1c | 14 | 14 | 17 | 24 | 11 | 14 | 14 |
| E Finnish197 G | N1c | 14 | 14 | 16 | 24 | 11 | 14 | 14 |
| E Finnish198 G | N1c | 14 | 14 | 17 | 24 | 11 | 14 | 14 |
| W Finnish84 G | N1c | 14 | 14 | 16 | 23 | 10 | 14 | 14 |
| Swedish21 G | N1c | 14 | 14 | 16 | 24 | 10 | 14 | 14 |
| Latvian05 G | N1c | 15 | 13 | 16 | 22 | 10 | 14 | 14 |
| Latvian06 G | N1c | 15 | 13 | 16 | 22 | 10 | 14 | 14 |
| Estonian30 G | N1c | 15 | 13 | 16 | 23 | 10 | 14 | 14 |
| Lithuanian04 G | N1c | 15 | 14 | 16 | 23 | 10 | 14 | 14 |
| Lithuanian05 G | N1c | 15 | 14 | 16 | 23 | 10 | 14 | 14 |
| Lithuanian06 G | N1c | 15 | 14 | 16 | 23 | 11 | 14 | 14 |
| Lithuanian07 G | N1c | 15 | 14 | 16 | 23 | 11 | 14 | 14 |
| Latvian07 G | N1c | 15 | 13 | 16 | 23 | 11 | 14 | 14 |
| Estonian31 G | N1c | 15 | 14 | 16 | 23 | 11 | 15 | 13 |
| Lithuanian08 G | N1c | 15 | 14 | 16 | 23 | 11 | 15 | 14 |
| Lithuanian09 G | N1c | 15 | 14 | 16 | 23 | 10 | 14 | 14 |
| Lithuanian10 G | N1c | 15 | 14 | 16 | 23 | 10 | 14 | 14 |
| Lithuanian11 G | N1c | 15 | 14 | 16 | 23 | 10 | 15 | 14 |
| Lithuanian12 G | N1c | 15 | 14 | 16 | 23 | 11 | 14 | 15 |
| Lithuanian13 G | N1c | 15 | 12 | 16 | 23 | 11 | 14 | 14 |
| W Finnish85 G | N1c | 15 | 13 | 16 | 22 | 11 | 14 | 14 |
| Estonian32 G | N1c | 15 | 13 | 16 | 23 | 10 | 14 | 14 |
| Lithuanian14 G | N1c | 15 | 13 | 16 | 23 | 10 | 14 | 14 |
| W Finnish86 G | N1c | 15 | 13 | 16 | 23 | 10 | 14 | 14 |
| W Finnish87 G | N1c | 15 | 13 | 16 | 23 | 10 | 14 | 14 |
| W Finnish88 G | N1c | 15 | 13 | 16 | 23 | 10 | 14 | 14 |
| W Finnish89 G | N1c | 15 | 13 | 16 | 23 | 10 | 14 | 15 |
| Latvian08 G | N1c | 15 | 13 | 16 | 23 | 11 | 14 | 14 |
| Latvian09 G | N1c | 15 | 13 | 16 | 23 | 11 | 14 | 14 |
| Latvian10 G | N1c | 15 | 13 | 16 | 23 | 11 | 14 | 14 |
| Latvian11 G | N1c | 15 | 13 | 16 | 23 | 11 | 14 | 14 |
| Lithuanian15 G | N1c | 15 | 13 | 16 | 23 | 11 | 14 | 14 |
| Lithuanian16 G | N1c | 15 | 13 | 16 | 23 | 11 | 14 | 14 |
| Lithuanian17 G | N1c | 15 | 13 | 16 | 23 | 11 | 14 | 14 |
| Lithuanian18 G | N1c | 15 | 13 | 16 | 23 | 11 | 14 | 14 |
| Lithuanian19 G | N1c | 15 | 13 | 16 | 23 | 11 | 14 | 14 |
| Lithuanian20 G | N1c | 15 | 13 | 16 | 23 | 11 | 15 | 14 |
| E Finnish199 G | N1c | 15 | 13 | 16 | 23 | 12 | 14 | 13 |
| W Finnish90 G | N1c | 15 | 13 | 16 | 24 | 10 | 14 | 13 |
| W Finnish91 G | N1c | 15 | 13 | 16 | 24 | 10 | 14 | 14 |
| E Finnish200 G | N1c | 15 | 13 | 16 | 24 | 11 | 14 | 15 |
| Karelian66 G | N1c | 15 | 13 | 17 | 23 | 11 | 14 | 14 |
| Swedish22 G | N1c | 15 | 13 | 17 | 23 | 11 | 14 | 14 |
| Lithuanian21 G | N1c | 15 | 14 | 15 | 23 | 11 | 13 | 14 |
| Lithuanian22 G | N1c | 15 | 14 | 15 | 23 | 11 | 13 | 14 |
| Lithuanian23 G | N1c | 15 | 14 | 15 | 23 | 11 | 14 | 14 |
| E Finnish201 G | N1c | 15 | 14 | 15 | 24 | 10 | 14 | 14 |
| Latvian12 G | N1c | 15 | 14 | 16 | 22 | 11 | 14 | 14 |
| Lithuanian24 G | N1c | 15 | 14 | 16 | 23 | 10 | 14 | 14 |
| Lithuanian25 G | N1c | 15 | 14 | 16 | 23 | 10 | 14 | 14 |
| Estonian33 G | N1c | 15 | 14 | 16 | 23 | 10 | 14 | 14 |
| Latvian13 G | N1c | 15 | 14 | 16 | 23 | 10 | 14 | 14 |
| Latvian14 G | N1c | 15 | 14 | 16 | 23 | 10 | 14 | 14 |
| Latvian15 G | N1c | 15 | 14 | 16 | 23 | 10 | 14 | 14 |
| Lithuanian26 G | N1c | 15 | 14 | 16 | 23 | 10 | 14 | 14 |
| Lithuanian27 G | N1c | 15 | 14 | 16 | 23 | 10 | 14 | 14 |
| Lithuanian28 G | N1c | 15 | 14 | 16 | 23 | 10 | 14 | 14 |
| Lithuanian29 G | N1c | 15 | 14 | 16 | 23 | 10 | 14 | 14 |
| Lithuanian30 G | N1c | 15 | 14 | 16 | 23 | 10 | 14 | 14 |
| Lithuanian31 G | N1c | 15 | 14 | 16 | 23 | 10 | 14 | 14 |
| W Finnish92 G | N1c | 15 | 14 | 16 | 23 | 10 | 14 | 14 |
| Latvian16 G | N1c | 15 | 14 | 16 | 23 | 10 | 15 | 14 |
| Latvian17 G | N1c | 15 | 14 | 16 | 23 | 11 | 14 | 14 |
| Lithuanian32 G | N1c | 15 | 14 | 16 | 23 | 11 | 14 | 14 |
| Lithuanian33 G | N1c | 15 | 14 | 16 | 23 | 11 | 14 | 14 |
| Lithuanian34 G | N1c | 15 | 14 | 16 | 23 | 11 | 14 | 14 |
| Lithuanian35 G | N1c | 15 | 14 | 16 | 23 | 11 | 14 | 14 |
| Lithuanian36 G | N1c | 15 | 14 | 16 | 23 | 11 | 14 | 14 |
| Lithuanian37 G | N1c | 15 | 14 | 16 | 23 | 11 | 14 | 14 |
| Lithuanian38 G | N1c | 15 | 14 | 16 | 23 | 11 | 14 | 14 |
| Lithuanian39 G | N1c | 15 | 14 | 16 | 23 | 11 | 14 | 14 |
| Lithuanian40 G | N1c | 15 | 14 | 16 | 23 | 11 | 14 | 14 |
| Lithuanian41 G | N1c | 15 | 14 | 16 | 23 | 11 | 14 | 14 |
| Lithuanian42 G | N1c | 15 | 14 | 16 | 23 | 11 | 14 | 14 |
| Lithuanian43 G | N1c | 15 | 14 | 16 | 23 | 11 | 14 | 14 |
| Lithuanian44 G | N1c | 15 | 14 | 16 | 23 | 11 | 14 | 14 |
| Lithuanian45 G | N1c | 15 | 14 | 16 | 23 | 11 | 14 | 14 |
| Lithuanian46 G | N1c | 15 | 14 | 16 | 23 | 11 | 14 | 14 |
| Lithuanian47 G | N1c | 15 | 14 | 16 | 23 | 11 | 14 | 14 |
| Karelian67 G | N1c | 15 | 14 | 16 | 23 | 11 | 14 | 14 |
| Lithuanian48 G | N1c | 15 | 14 | 16 | 23 | 11 | 15 | 13 |
| Lithuanian49 G | N1c | 15 | 14 | 16 | 23 | 11 | 15 | 14 |
| Lithuanian50 G | N1c | 15 | 14 | 16 | 24 | 10 | 14 | 14 |
| Swedish23 G | N1c | 15 | 14 | 16 | 24 | 10 | 14 | 14 |
| Lithuanian51 G | N1c | 15 | 14 | 16 | 24 | 11 | 14 | 14 |
| Lithuanian52 G | N1c | 15 | 14 | 16 | 24 | 11 | 14 | 14 |
| Lithuanian53 G | N1c | 15 | 14 | 16 | 24 | 11 | 14 | 14 |
| E Finnish202 G | N1c | 15 | 14 | 16 | 24 | 11 | 14 | 14 |
| E Finnish203 G | N1c | 15 | 14 | 16 | 24 | 11 | 14 | 14 |
| W Finnish93 G | N1c | 15 | 14 | 16 | 24 | 11 | 14 | 14 |
| Lithuanian54 G | N1c | 15 | 14 | 16 | 24 | 11 | 14 | 15 |
| E Finnish204 G | N1c | 15 | 14 | 16 | 24 | 11 | 14 | 15 |
| Swedish23 G | N1c | 15 | 14 | 16 | 24 | 11 | 15 | 14 |
| E Finnish205 G | N1c | 15 | 14 | 16 | 24 | 12 | 14 | 14 |
| Lithuanian55 G | N1c | 15 | 14 | 17 | 23 | 10 | 14 | 14 |
| Lithuanian56 G | N1c | 15 | 14 | 17 | 23 | 11 | 14 | 14 |
| Lithuanian57 G | N1c | 15 | 14 | 17 | 23 | 11 | 14 | 14 |
| Lithuanian58 G | N1c | 15 | 14 | 17 | 23 | 11 | 14 | 14 |
| Lithuanian59 G | N1c | 15 | 14 | 17 | 23 | 11 | 14 | 14 |
| Lithuanian60 G | N1c | 15 | 14 | 17 | 23 | 12 | 15 | 14 |
| E Finnish206 G | N1c | 15 | 14 | 17 | 24 | 10 | 14 | 14 |
| Lithuanian61 | N1c | 15 | 14 | 17 | 24 | 11 | 14 | 14 |
| E Finnish207 G | N1c | 15 | 14 | 17 | 25 | 11 | 14 | 14 |
| Latvian18 G | N1c | 15 | 14 | 18 | 23 | 10 | 15 | 15 |
| E Finnish208 G | N1c | 15 | 13 | 16 | 23 | 11 | 14 | 13 |
| W Finnish94 G | N1c | 15 | 13 | 16 | 24 | 10 | 14 | 14 |
| E Finnish209 G | N1c | 15 | 14 | 16 | 24 | 11 | 13 | 14 |
| E Finnish210 G | N1c | 15 | 15 | 16 | 24 | 11 | 14 | 14 |
| E Finnish211 G | N1c | 15 | 13 | 16 | 23 | 11 | 14 | 14 |
| E Finnish212 G | N1c | 15 | 14 | 16 | 24 | 10 | 14 | 14 |
| E Finnish213 G | N1c | 15 | 14 | 15 | 25 | 12 | 14 | 14 |
| W Finnish95 G | N1c | 15 | 14 | 16 | 24 | 11 | 14 | 14 |
| Lithuanian62 G | N1c | 15 | 13 | 16 | 24 | 11 | 14 | 14 |
| Lithuanian63 G | N1c | 15 | 14 | 16 | 23 | 11 | 15 | 14 |
| Latvian19 G | N1c | 15 | 13 | 16 | 23 | 10 | 12 | 14 |
| Estonian34 G | N1c | 15 | 13 | 16 | 23 | 10 | 14 | 14 |
| Latvian20 G | N1c | 15 | 13 | 16 | 23 | 10 | 14 | 14 |
| Latvian21 G | N1c | 15 | 13 | 16 | 23 | 10 | 14 | 14 |
| Latvian22 G | N1c | 15 | 13 | 16 | 23 | 10 | 14 | 14 |
| Estonian35 G | N1c | 15 | 13 | 16 | 23 | 11 | 14 | 14 |
| Latvian23 G | N1c | 15 | 13 | 16 | 23 | 11 | 14 | 14 |
| Latvian24 G | N1c | 15 | 13 | 16 | 23 | 11 | 14 | 14 |
| Latvian25 G | N1c | 15 | 13 | 16 | 23 | 11 | 14 | 14 |
| Latvian26 G | N1c | 15 | 13 | 16 | 23 | 11 | 14 | 14 |
| Latvian27 G | N1c | 15 | 13 | 16 | 23 | 11 | 14 | 14 |
| Latvian28 G | N1c | 15 | 13 | 16 | 23 | 11 | 14 | 14 |
| Lithuanian64 G | N1c | 15 | 13 | 16 | 23 | 11 | 14 | 14 |
| Latvian29 G | N1c | 15 | 13 | 16 | 24 | 10 | 14 | 14 |
| Latvian30 G | N1c | 15 | 13 | 16 | 24 | 10 | 14 | 14 |
| Latvian31 G | N1c | 15 | 13 | 17 | 23 | 11 | 14 | 14 |
| Latvian32 G | N1c | 15 | 13 | 17 | 23 | 11 | 14 | 14 |
| Karelian68 G | N1c | 15 | 13 | 17 | 23 | 11 | 14 | 14 |
| Latvian33 G | N1c | 15 | 13 | 17 | 24 | 11 | 14 | 14 |
| Latvian34 G | N1c | 15 | 13 | 18 | 23 | 11 | 14 | 14 |
| Latvian35 G | N1c | 15 | 14 | 15 | 23 | 11 | 14 | 14 |
| Estonian36 G | N1c | 15 | 14 | 16 | 23 | 11 | 14 | 14 |
| Latvian36 G | N1c | 15 | 14 | 16 | 23 | 11 | 14 | 14 |
| Latvian37 G | N1c | 15 | 14 | 16 | 23 | 11 | 14 | 14 |
| Latvian38 G | N1c | 15 | 14 | 16 | 23 | 11 | 14 | 14 |
| Latvian39 G | N1c | 15 | 14 | 16 | 23 | 11 | 14 | 14 |
| Latvian40 G | N1c | 15 | 14 | 16 | 23 | 11 | 14 | 14 |
| Lithuanian65 G | N1c | 15 | 14 | 16 | 23 | 11 | 14 | 14 |
| Lithuanian66 G | N1c | 15 | 14 | 16 | 23 | 11 | 15 | 14 |
| Lithuanian67 G | N1c | 15 | 14 | 17 | 23 | 11 | 13 | 14 |
| Latvian41 G | N1c | 15 | 14 | 17 | 23 | 12 | 14 | 14 |
| E Finnish214 G | N1c | 15 | 15 | 16 | 24 | 11 | 15 | 13 |
| Estonian37 G | N1c | 15 | 13 | 16 | 23 | 11 | 14 | 14 |
| Estonian38 G | N1c | 15 | 13 | 16 | 23 | 11 | 14 | 13 |
| Estonian39 G | N1c | 15 | 13 | 16 | 23 | 11 | 14 | 14 |
| Karelian69 G | N1c | 15 | 13 | 16 | 23 | 11 | 14 | 14 |
| Latvian42 G | N1c | 15 | 14 | 16 | 23 | 10 | 14 | 14 |
| Lithuanian68 G | N1c | 15 | 14 | 16 | 23 | 11 | 15 | 13 |
| Latvian43 G | N1c | 15 | 13 | 16 | 23 | 10 | 14 | 14 |
| Latvian44 G | N1c | 15 | 13 | 16 | 23 | 10 | 14 | 14 |
| Lithuanian69 G | N1c | 15 | 13 | 16 | 23 | 11 | 15 | 15 |
| Lithuanian70 G | N1c | 15 | 13 | 17 | 23 | 10 | 15 | 14 |
| Lithuanian71 G | N1c | 15 | 14 | 17 | 23 | 11 | 14 | 14 |
| W Finnish96 G | N1c | 15 | 14 | 16 | 23 | 11 | 14 | 13 |
| Lithuanian72 G | N1c | 16 | 14 | 16 | 23 | 11 | 14 | 14 |
| Karelian70 G | N1c | 16 | 14 | 16 | 24 | 11 | 14 | 14 |
| Latvian45 G | N1c | 16 | 14 | 17 | 23 | 11 | 14 | 14 |
| E Finnish215 G | N1c | 16 | 14 | 17 | 24 | 10 | 14 | 14 |
| W Finnish97 G | N1c | 16 | 11 | 16 | 23 | 11 | 14 | 14 |
| Latvian46 G | N1c | 16 | 12 | 15 | 23 | 11 | 14 | 14 |
| Latvian47 G | N1c | 16 | 13 | 15 | 23 | 10 | 14 | 14 |
| Estonian40 G | N1c | 16 | 14 | 16 | 23 | 11 | 13 | 14 |
| Lithuanian73 G | N1c | 16 | 14 | 18 | 24 | 11 | 14 | 15 |

Note: A is from Hammer *et al*, 2006, B is from Cai *et al*, 2011, C is from Rootsi *et al*, 2007, and D is from Balanovsk *et al*, 2008; E is from Derenko *et al*, 2007,F is from Lappalainen *et al*, 2006, G is from Lappalainen *et al*, 2008.
